# Supplementary material for: Solvent-free one-pot synthesis of 1,2,3-triazole derivatives by the ‘Click’ reaction of alkyl halides or aryl boronic acids, sodium azide and terminal alkynes over a Cu/Al2O3surface under ball-milling
Source: Royal Society of Chemistry journal article supplement (doi:10.1039/c2gc36521a), 2012-11-26

## Electronic Supplementary Information

### **Solvent-free one-pot synthesis of 1,2,3-triazole derivatives by ‘Click’ reaction of alkyl halides or aryl boronic acids, sodium azide and terminal alkynes over Cu/Al<sub>2</sub>O<sub>3</sub> surface under ball-milling**

Nirmalya Mukherjee, Sabir Ahammed, Sukalyan Bhadra and Brindaban C. Ranu\*

#### Table of Contents

|                                                                                             |       |
|---------------------------------------------------------------------------------------------|-------|
| 1. Characterization data of all known compounds listed in Table 2 and Table 4               | 2-3   |
| 2. <sup>1</sup> H and <sup>13</sup> C NMR spectra of all the compounds mentioned in Table 2 | 4-19  |
| 3. <sup>1</sup> H and <sup>13</sup> C NMR spectra of all the compounds mentioned in Table 4 | 20-26 |

## Characterization data of all known compounds listed in Table 2 and Table 4

### 1-benzyl-4-(3-fluorophenyl)-1*H*-1,2,3-triazole (Table 2, entry 2)<sup>23a</sup>

White solid (87%); <sup>1</sup>H NMR (500 MHz, DMSO-*d*<sub>6</sub>) δ 5.64 (s, 2H), 7.12-7.15 (m, 2H), 7.29-7.39 (m, 5H), 7.44-7.48 (m, 1H), 7.63-7.69 (m, 2H), 8.71 (s, 1H); <sup>13</sup>C NMR (125 MHz, DMSO-*d*<sub>6</sub>) δ 53.0, 111.6, 11.8, 114.4, 114.6, 121.2, 122.2, 127.9, 128.2, 130.9, 131.0, 133.0, 133.0, 135.8, 145.5, 161.6, 163.5.

### 1-benzyl-4-(4-bromophenyl)-1*H*-1,2,3-triazole (Table 2, entry 3)<sup>23b</sup>

White solid (90%); <sup>1</sup>H NMR (500 MHz, DMSO-*d*<sub>6</sub>) δ 5.65 (s, 2H), 7.36 (s, 5H), 7.63 (s, 2H), 7.80 (s, 2H), 8.71 (s, 1H); <sup>13</sup>C NMR (125 MHz, DMSO-*d*<sub>6</sub>) δ 53.7, 121.5, 122.6, 127.8, 128.6, 128.8, 129.4, 130.6, 132.5, 136.5, 146.2.

### 1-benzyl-4-(2-nitrophenyl)-1*H*-1,2,3-triazole (Table 2, entry 4)<sup>23b</sup>

White solid (94%); <sup>1</sup>H NMR (300 MHz, DMSO-*d*<sub>6</sub>) δ 5.67 (s, 2H), 7.33-7.38 (m, 5H), 7.60-7.62 (m, 1H), 7.31 (d, *J* = 12 Hz, 1H), 7.80 (t, *J* = 3 Hz, 1H), 7.88-7.91 (m, 1H), 8.60 (s, 1H); <sup>13</sup>C NMR (75 MHz, DMSO-*d*<sub>6</sub>) δ 53.0, 123.4, 123.7, 123.9, 127.9, 128.2, 128.8, 129.4, 130.3, 132.5, 135.8, 141.8, 148.1.

### 4-(1-benzyl-1*H*-1,2,3-triazol-4-yl) benzonitrile (Table 2, entry 5)<sup>23c</sup>

White solid (87%); <sup>1</sup>H NMR (500 MHz, DMSO-*d*<sub>6</sub>) δ 5.66 (s, 2H), 7.31-7.38 (m, 5H), 7.87 (d, *J* = 5 Hz, 2H), 8.02 (d, *J* = 10 Hz, 2H), 8.88 (d, *J* = 5 Hz, 1H); <sup>13</sup>C NMR (125 MHz, DMSO-*d*<sub>6</sub>) δ 53.7, 110.7, 119.4, 123.9, 126.3, 128.6, 129.8, 129.4, 133.6, 135.7, 136.3, 145.7.

### 1-benzyl-4-(4-methoxyphenyl)-1*H*-1,2,3-triazole (Table 2, entry 6)<sup>11a</sup>

White solid (86%); <sup>1</sup>H NMR (500 MHz, DMSO-*d*<sub>6</sub>) δ 3.75 (s, 3H), 5.58 (s, 2H), 6.94 (d, *J* = 10 Hz, 2H), 8.24 (s, 1H), 8.45 (s, 1H); <sup>13</sup>C NMR (125 MHz, DMSO-*d*<sub>6</sub>) δ 53.6, 55.7, 114.8, 121.0, 123.9, 127.1, 128.4, 128.7, 129.3, 136.6, 147.2, 159.6.

### 1-benzyl-4-(4-(thiophen-3-yl)phenyl)-1*H*-1,2,3-triazole (Table 2, entry 7)<sup>23d</sup>

White solid (81%); <sup>1</sup>H NMR (500 MHz, DMSO-*d*<sub>6</sub>) δ 5.63 (s, 2H), 7.32-7.39 (m, 5H), 7.50 (d, *J* = 5 Hz, 1H), 7.62 (t, *J* = 3 Hz, 1H), 7.84 (d, *J* = 2 Hz, 1H), 8.48 (s, 1H); <sup>13</sup>C NMR (125 MHz, DMSO-*d*<sub>6</sub>) δ 53.6, 121.5, 121.9, 126.4, 127.7, 128.5, 128.8, 129.4.

### 1-benzyl-5-(4-(1-benzyl-1*H*-1,2,3-triazol-4-yl)phenyl)-1*H*-1,2,3-triazole (Table 2, entry 8)<sup>23e</sup>

White solid (87%); <sup>1</sup>H NMR (500 MHz, DMSO-*d*<sub>6</sub>) δ 5.65 (s, 1H), 7.36 (s, 10H), 7.53 (s, 2H), 7.85 (s, 2H), 8.77 (s, 2H); <sup>13</sup>C NMR (125 MHz, DMSO-*d*<sub>6</sub>) δ 53.0, 122.2, 125.6, 127.9, 128.1, 128.8, 131.0, 135.9, 145.8.

### 1-cyclohexyl-4-phenyl-1*H*-1,2,3-triazole (Table 2, entry 9)<sup>11a</sup>

White solid (78%), <sup>1</sup>H NMR (500 MHz, CDCl<sub>3</sub>) δ 1.29-1.35 (m, 1H), 1.45-1.53 (m, 2H), 1.76-1.84 (m, 3H), 1.94-1.96 (m, 2H), 2.26 (d, *J* = 15 Hz, 2H), 4.47-4.52 (m, 1H), 7.32 (t, *J* = 5 Hz, 1H), 7.41 (t, *J* = 10 Hz, 2H), 7.75 (s, 1H), 7.82 (d, *J* = 5 Hz, 2H); <sup>13</sup>C NMR (125 MHz, CDCl<sub>3</sub>) δ 12.3, 25.3, 33.8, 60.3, 117.4, 125.8, 128.1, 128.9, 131.1.

### Bis(4-phenyl-1*H*-1,2,3-triazol-1-yl) methane (Table 2, entry 10)<sup>11b</sup>

Ivory solid (80%), <sup>1</sup>H NMR (300 MHz, CDCl<sub>3</sub>) δ 5.57 (s, 2H), 7.30-7.40 (m, 8H), 7.70 (s, 2H), 7.83 (s, 2H); <sup>13</sup>C NMR (75 MHz, CDCl<sub>3</sub>) δ 54.4, 126.2, 128.2, 128.4, 129.0, 129.3, 132.3.

**(1-benzyl-1*H*-1,2,3-triazol-4-yl) methanol (Table 2, entry 11)<sup>11a</sup>**

White solid (85%), <sup>1</sup>H NMR (500 MHz, DMSO-*d*<sub>6</sub>) δ 4.48 (d, *J* = 4 Hz, 2H), 5.23 (s, 1H), 5.56 (s, 2H), 7.26-7.33 (m, 5H), 8.06 (s, 1H); <sup>13</sup>C NMR (125 MHz, DMSO-*d*<sub>6</sub>) δ 52.7, 54.9, 123.0, 128.0, 128.0, 128.7, 136.1, 148.1.

**1-benzyl-4-butyl-1*H*-1,2,3-triazole (Table 2, entry 12)<sup>11a</sup>**

White solid (80%), <sup>1</sup>H NMR (500 MHz, CDCl<sub>3</sub>) δ 0.82 (t, *J* = 7 Hz, 3H), 1.27 (q, *J* = 7 Hz, 2H), 1.54 (t, *J* = 7 Hz, 2H), 2.60 (t, *J* = 8 Hz, 2H), 5.40 (s, 2H), 7.15 (d, *J* = 7 Hz, 3H), 7.26 (q, *J* = 7 Hz, 3H); <sup>13</sup>C NMR (125 MHz, CDCl<sub>3</sub>) δ 13.8, 22.3, 25.4, 31.5, 54.0, 128.0, 128.6, 129.0, 135.0.

**Ethyl 1-benzyl-1*H*-1,2,3-triazole-4-carboxylate (Table 2, entry 13)<sup>11a</sup>**

White solid (88%), <sup>1</sup>H NMR (500 MHz, DMSO-*d*<sub>6</sub>) δ 1.27 (t, *J* = 7 Hz, 3H), 4.28 (q, *J* = 7 Hz, 2H), 5.67 (s, 2H), 7.33-7.37 (m, 5H), 8.90 (s, 1H); <sup>13</sup>C NMR (125 MHz, DMSO-*d*<sub>6</sub>) δ 14.7, 53.6, 61.1, 128.6, 128.8, 129.3, 129.7, 139.5, 160.8.

**1-cinnamyl-4-phenyl-1*H*-1,2,3-triazole (Table 2, entry 14)<sup>23d</sup>**

White solid (70%), <sup>1</sup>H NMR (500 MHz, DMSO-*d*<sub>6</sub>) δ 5.27 (d, *J* = 6 Hz, 2H), 6.54-6.58 (m, 1H), 6.71 (d, *J* = 16 Hz, 1H), 7.26-7.36 (m, 4H), 7.42-7.49 (m, 4H), 7.86 (d, *J* = 7.5 Hz, 2H), 8.63 (s, 1H); <sup>13</sup>C NMR (125 MHz, DMSO-*d*<sub>6</sub>) δ 51.5, 121.3, 123.5, 125.2, 126.6, 127.9, 128.2, 128.7, 128.9, 133.8, 135.8.

**1-(3-bromobenzyl)-4-phenyl-1*H*-1,2,3-triazole (Table 2, entry 15)<sup>23a</sup>**

White solid (92%), <sup>1</sup>H NMR (500 MHz, CDCl<sub>3</sub>) δ 5.51 (s, 2H), 7.22-7.28 (m, 2H), 7.33 (t, *J* = 6 Hz, 1H), 7.42 (t, *J* = 7.5 Hz, 2H), 7.47-7.51 (m, 2H), 7.71 (s, 1H), 7.82 (d, *J* = 7 Hz, 2H); <sup>13</sup>C NMR (125 MHz, CDCl<sub>3</sub>) δ 53.5, 119.6, 123.3, 125.9, 126.7, 128.4, 128.9, 130.5, 130.8, 131.1, 132.0, 137.0, 148.6.

**1-(3-(trifluoromethyl)benzyl)-4-phenyl-1*H*-1,2,3-triazole (Table 2, entry 16)<sup>23g</sup>**

Ivory solid (91%), <sup>1</sup>H NMR (500 MHz, CDCl<sub>3</sub>) δ 5.78 (s, 2H), 7.32 (t, *J* = 7 Hz, 1H), 7.43 (t, *J* = 7.5 Hz, 2H), 7.64 (t, *J* = 6 Hz, 2H), 7.71 (d, *J* = 6.5 Hz, 1H), 7.77 (s, 1H), 7.84 (d, *J* = 7.5 Hz, 2H), 8.73 (s, 1H); <sup>13</sup>C NMR (125 MHz, DMSO-*d*<sub>6</sub>) δ 52.8, 122.4, 125.1, 125.5, 125.5, 125.7, 128.5, 129.4, 130.5, 131.1, 132.7, 137.9, 147.3.

**4-phenyl-1-*p*-tolyl-1*H*-1,2,3-triazole (Table 4, entry 2)<sup>23f</sup>**

White solid (90%), <sup>1</sup>H NMR (500 MHz, CDCl<sub>3</sub>) δ 2.43 (s, 3H), 7.33-7.38 (m, 3H), 7.45 (t, *J* = 7.5 Hz, 2H), 7.66 (d, *J* = 8.5 Hz, 2H), 7.90 (d, *J* = 7.5 Hz, 2H), 8.153 (s, 1H); <sup>13</sup>C NMR (125 MHz, CDCl<sub>3</sub>) δ 21.2, 117.8, 120.6, 126.0, 128.5, 129.0, 130.4, 130.5, 135.0, 139.0, 148.4.

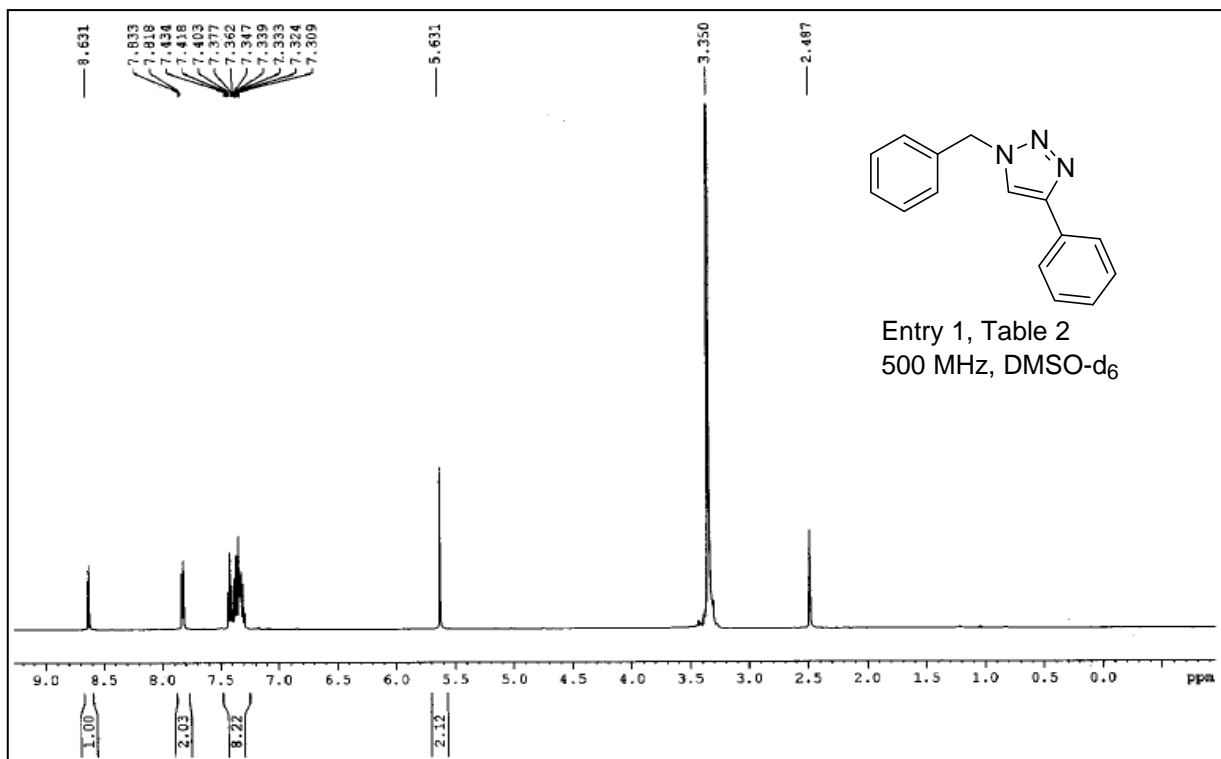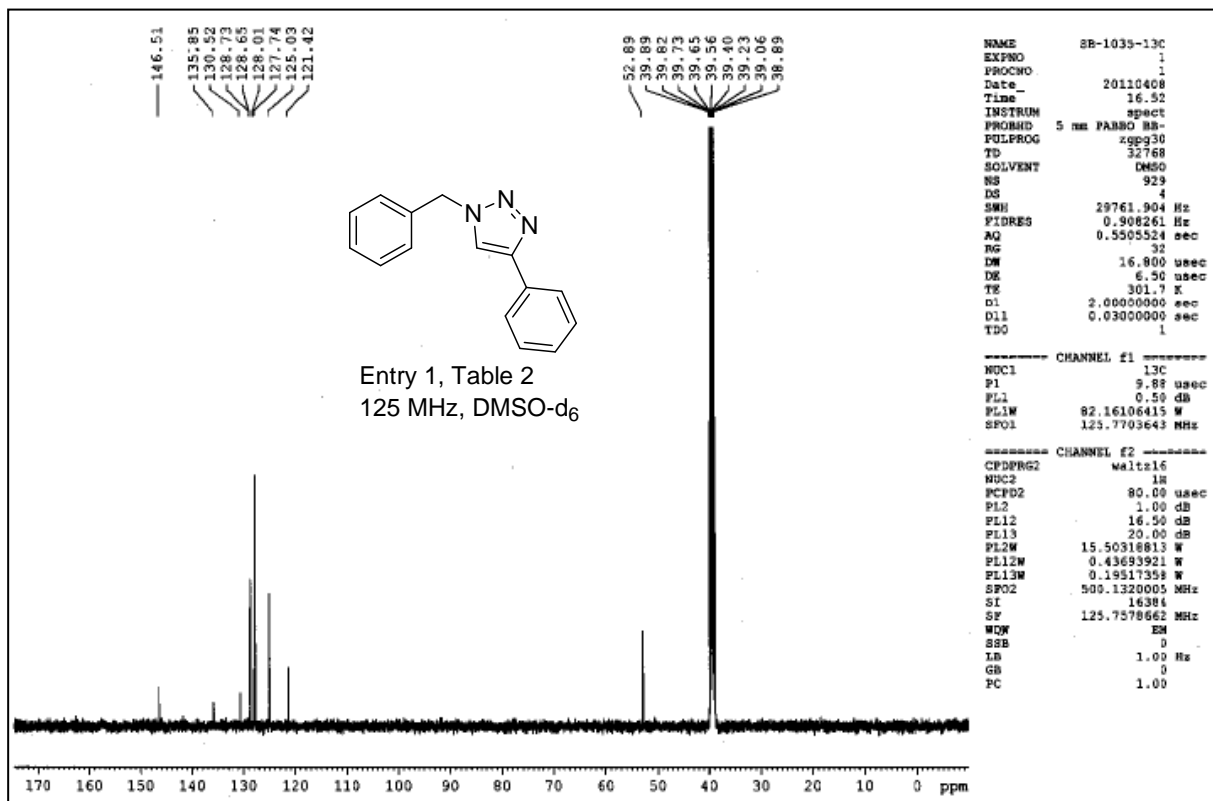

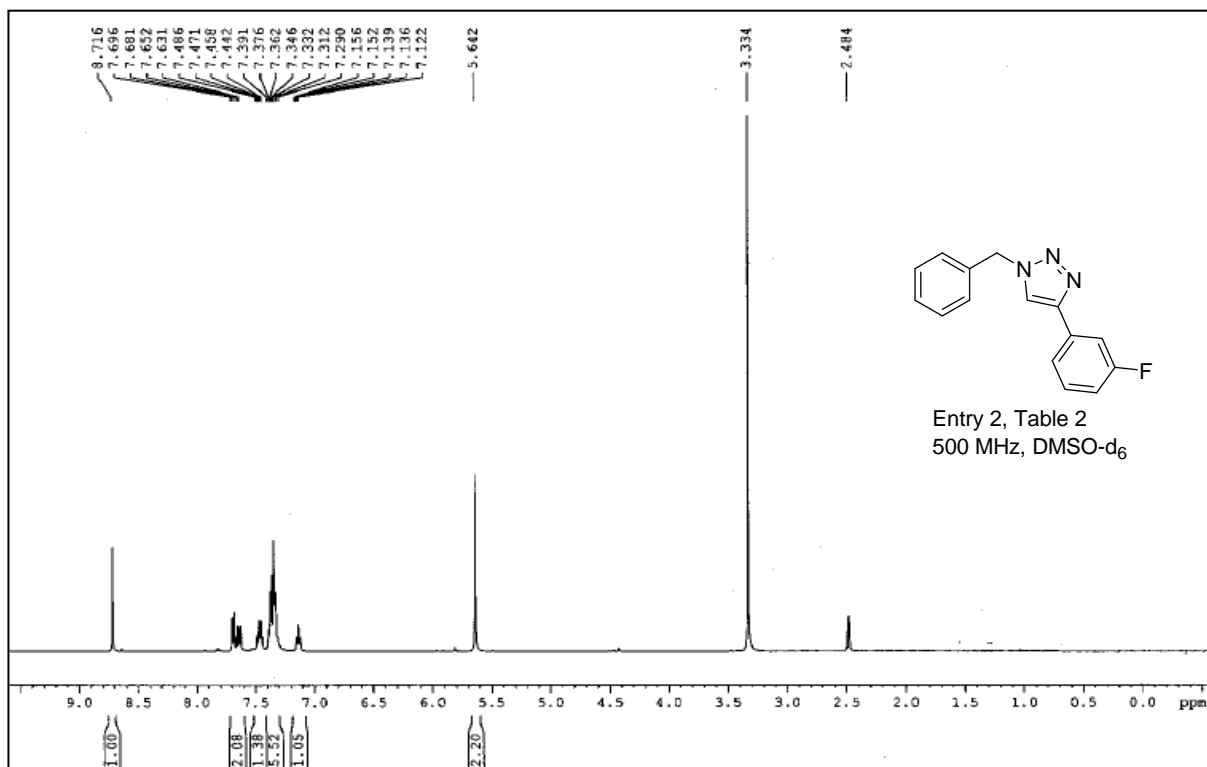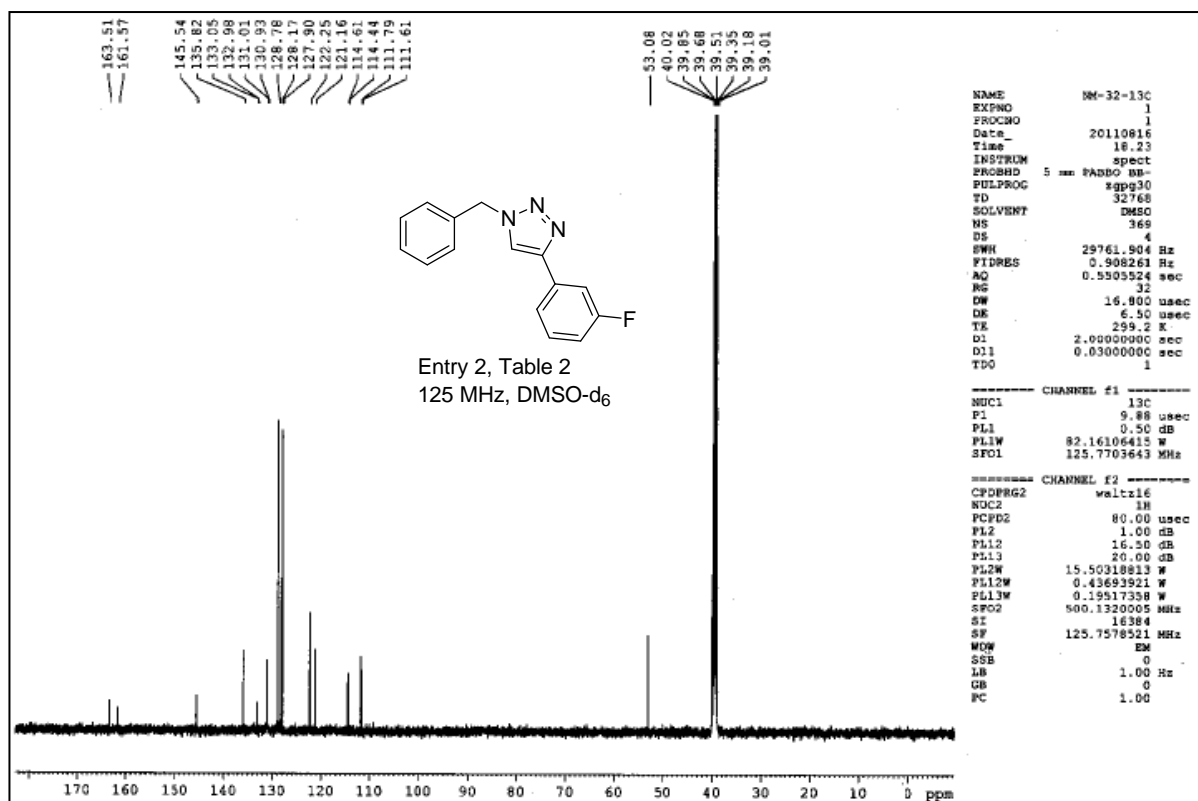

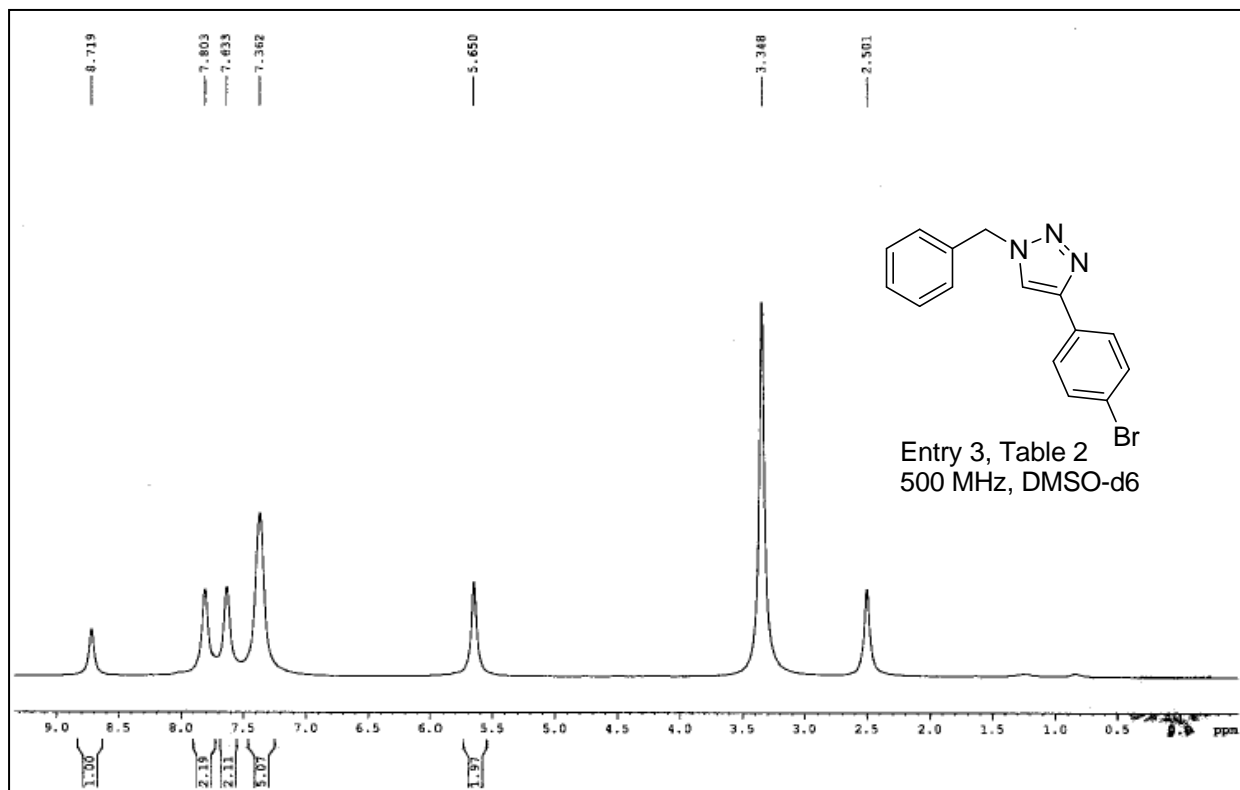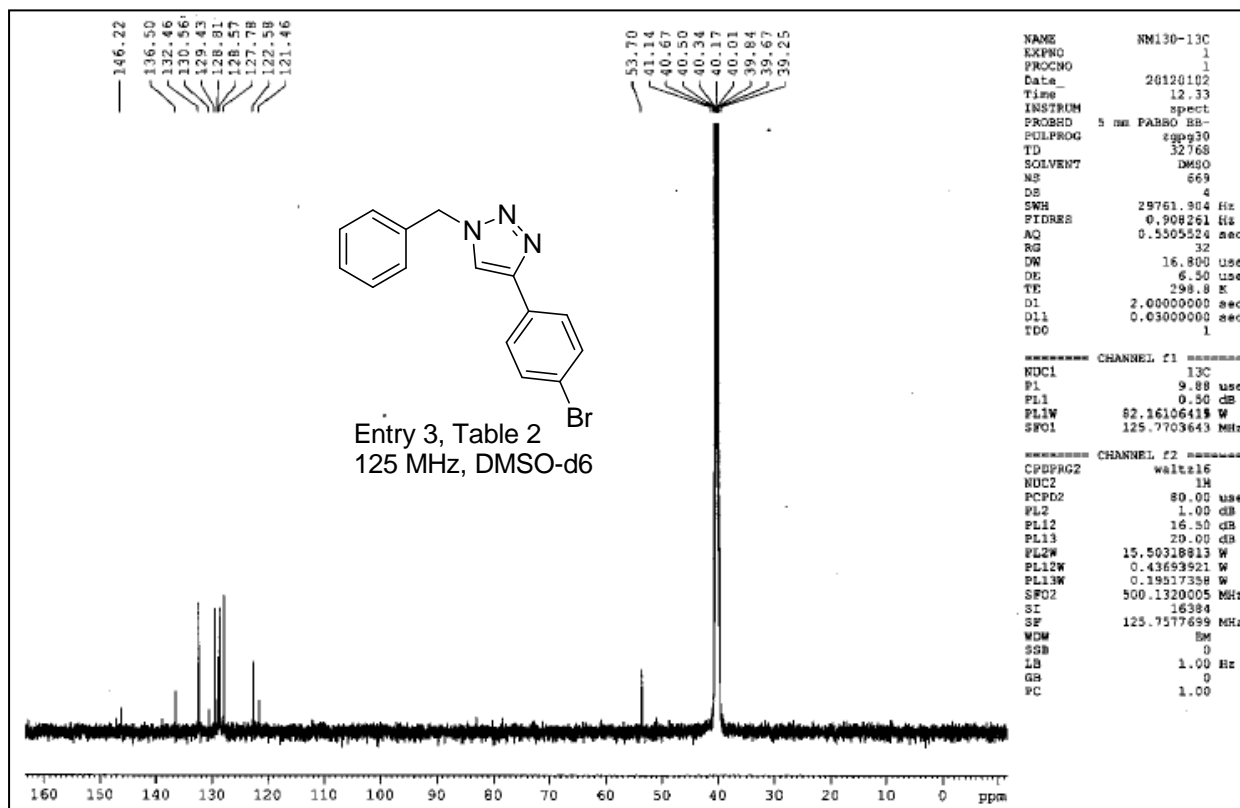

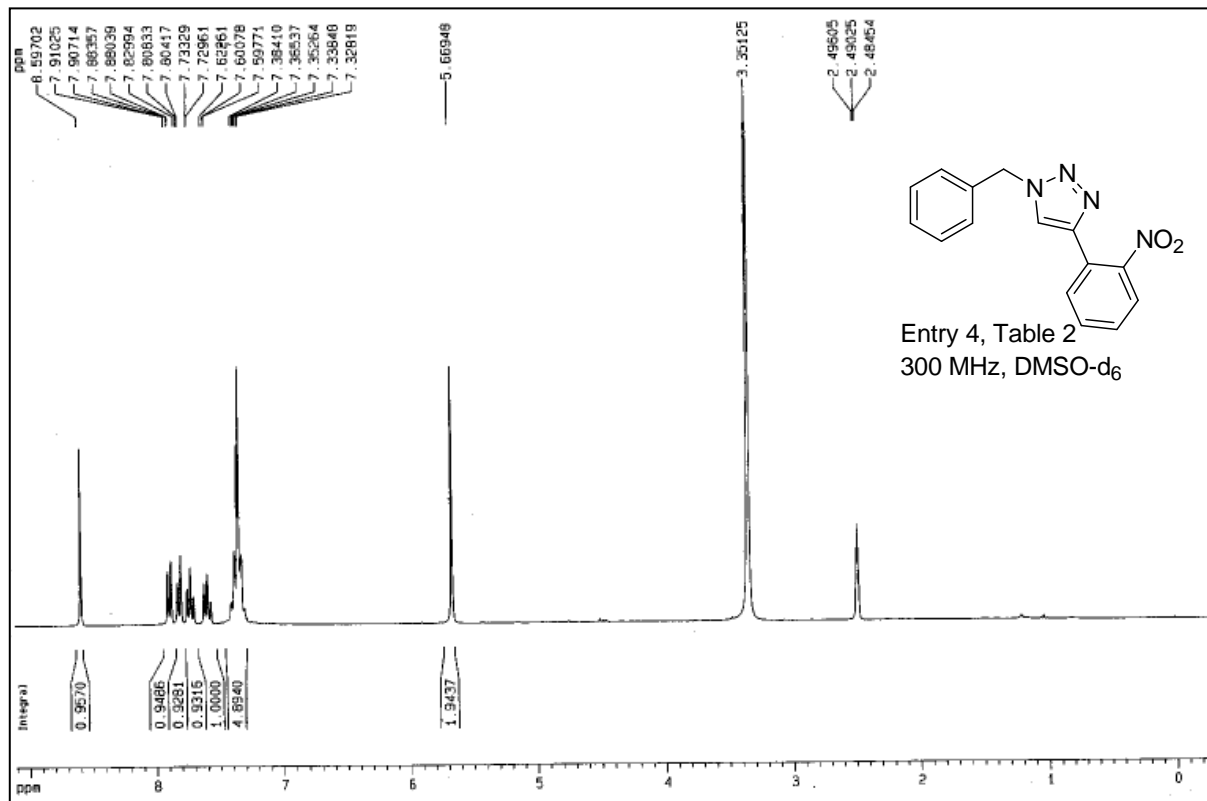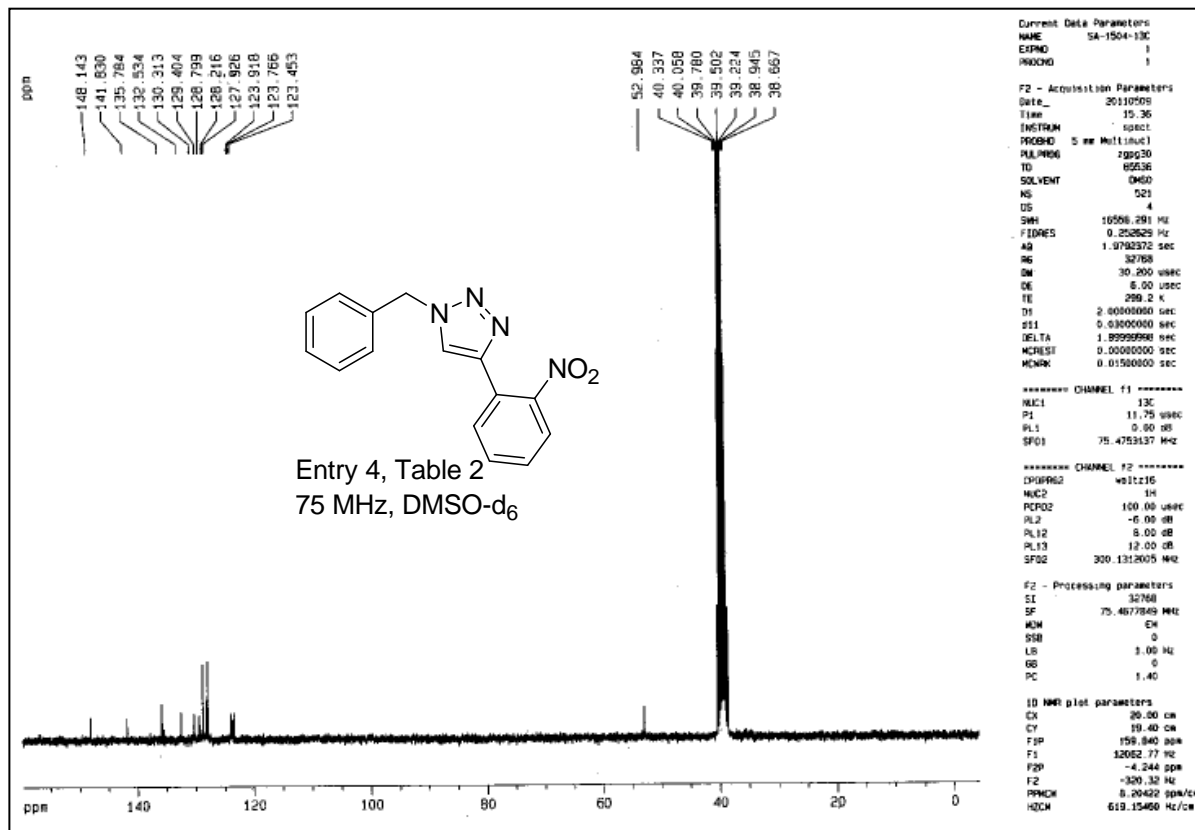

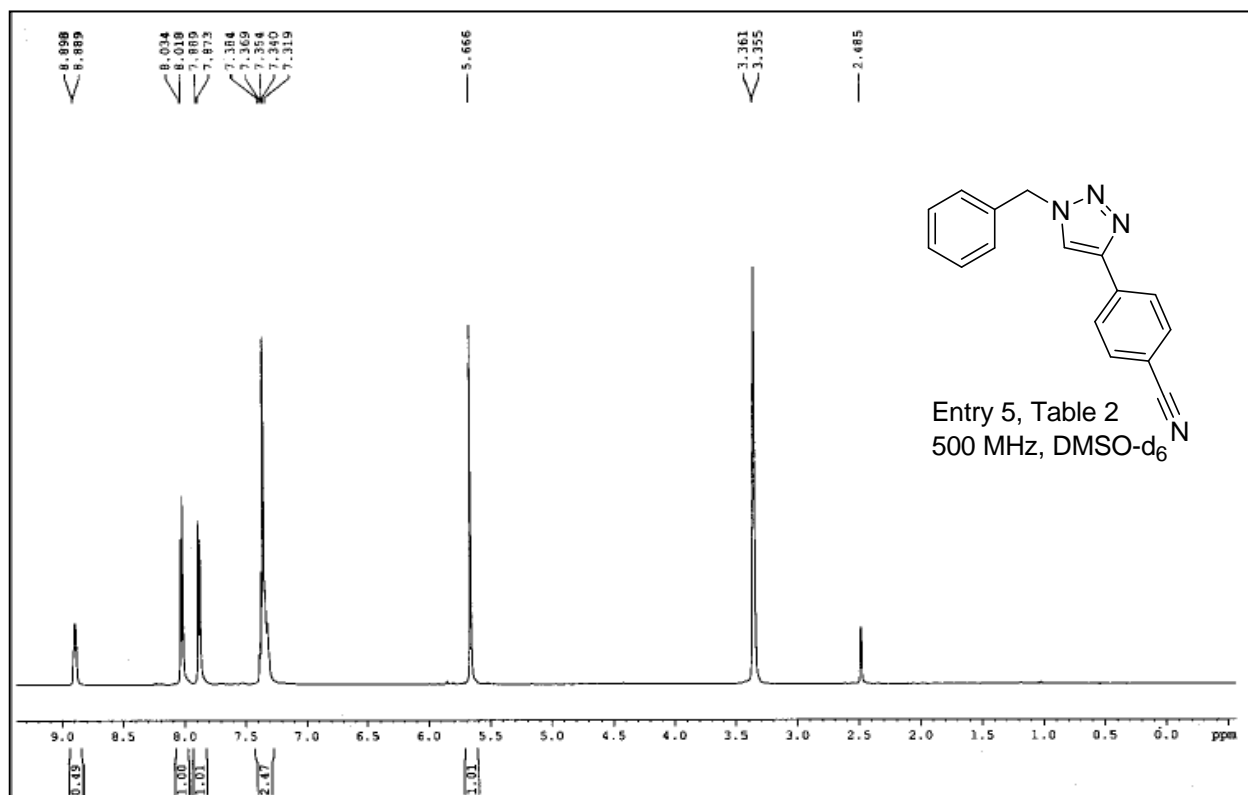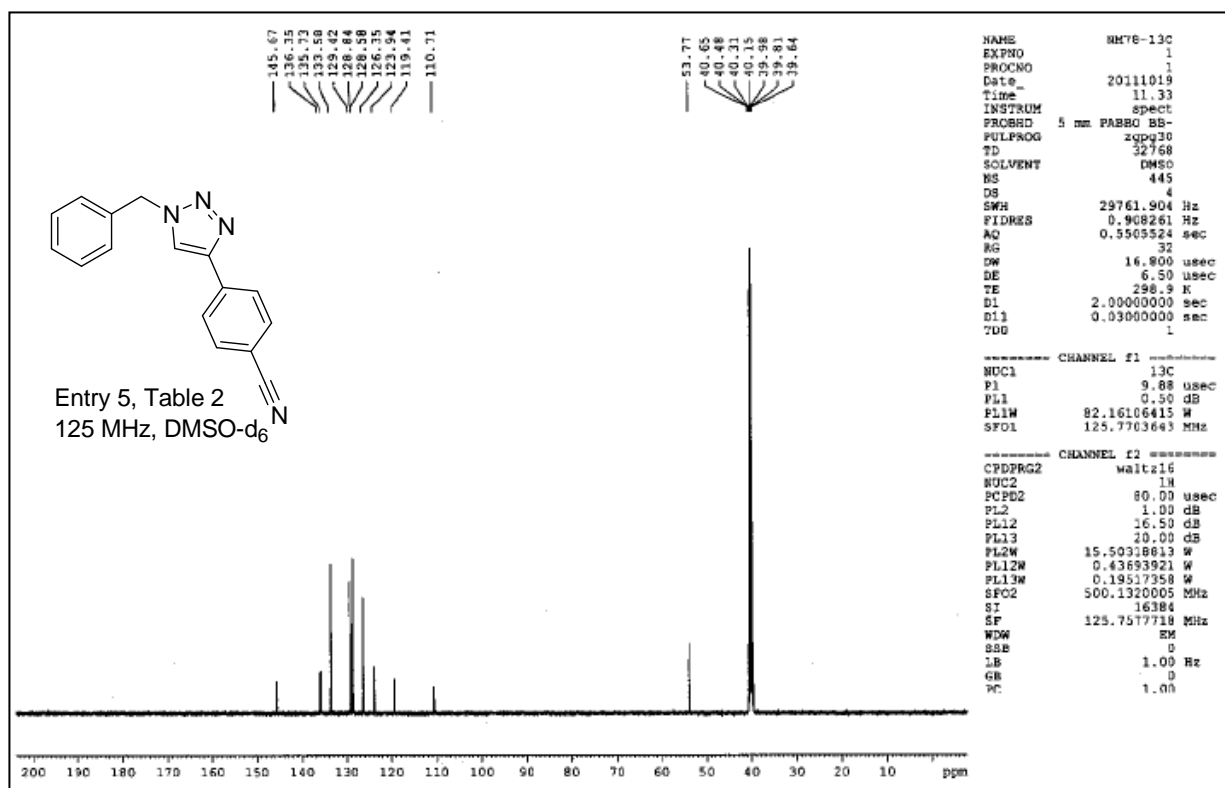



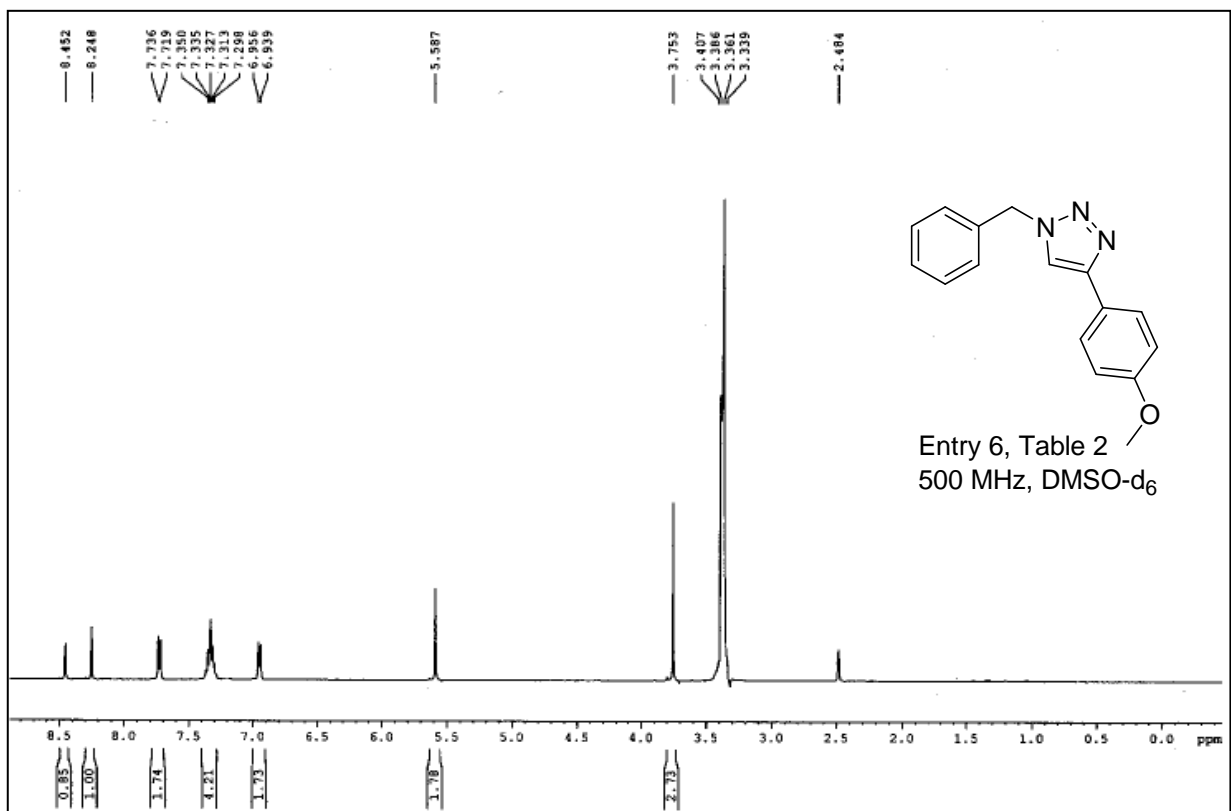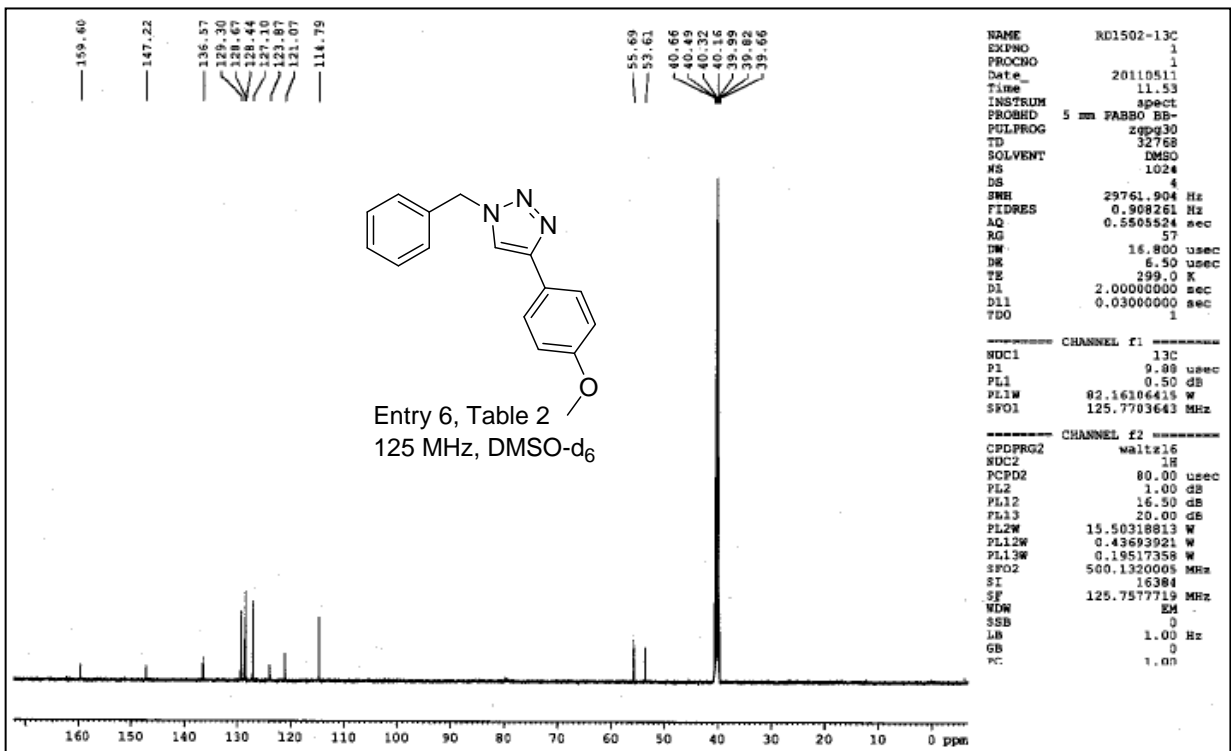

```

NAME          RD1502-13C
EXPNO         1
PROCNO        1
Date_         20110511
Time          11.53
INSTRUM       spect
PROBHD        5 mm FAPBO BB-
PULPROG       zgpg30
TD            32768
SOLVENT       DMSO
NS            1024
DS            4
SWH           29761.904 Hz
FIDRES        0.908261 Hz
AQ            0.5505524 sec
RG            57
DM            16.800 usec
DE            6.50 usec
TE            299.0 K
D1            2.0000000 sec
D11           0.0300000 sec
TDO           1

===== CHANNEL f1 =====
NUC1          13C
P1            9.98 usec
PL1           0.50 dB
PL1W          82.16106415 W
SFO1          125.7703643 MHz

===== CHANNEL f2 =====
CPDPRG2       waltz16
NUC2          1H
PCPD2         80.00 usec
PL2           1.00 dB
PL12          16.50 dB
PL13          20.00 dB
PL2W          15.50318813 W
PL12W         0.43893921 W
PL13W         0.19517358 W
SFO2          500.1320005 MHz
SI            16384
SF            125.7577719 MHz
WDW           EM
SSB           0
LB            1.00 Hz
GB            0
PC            1.00
    
```

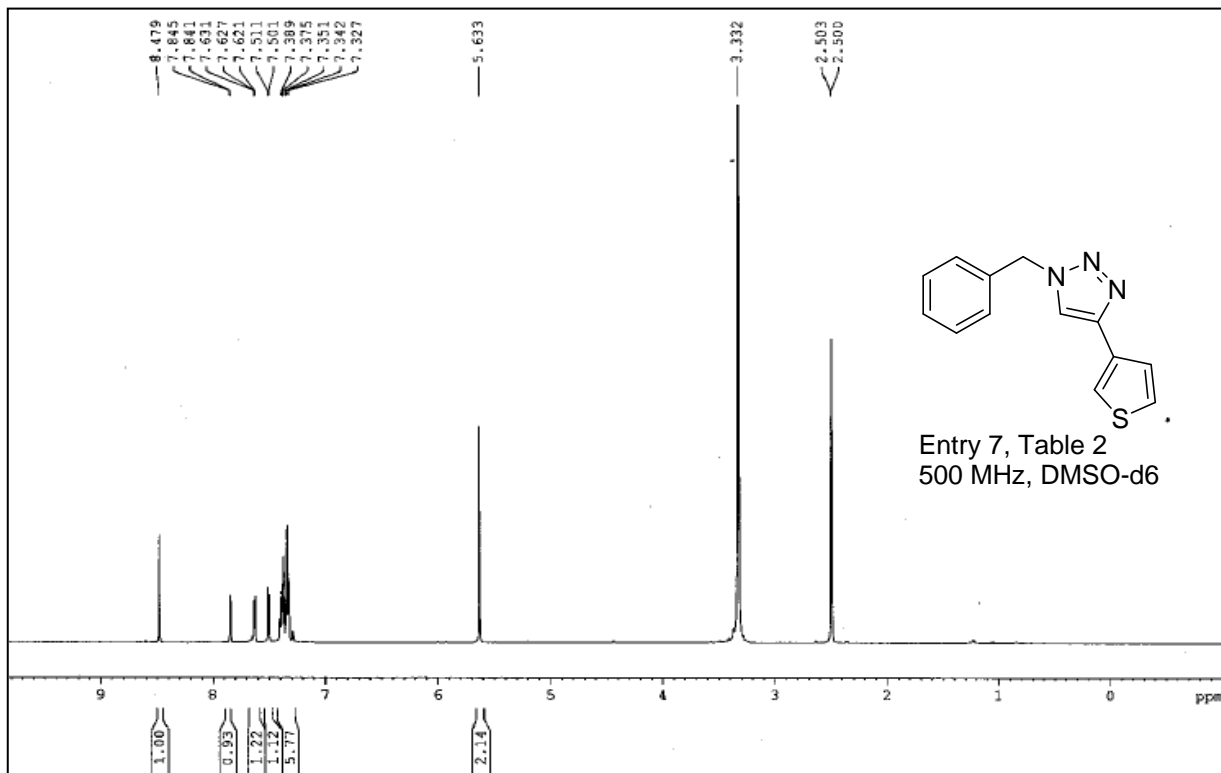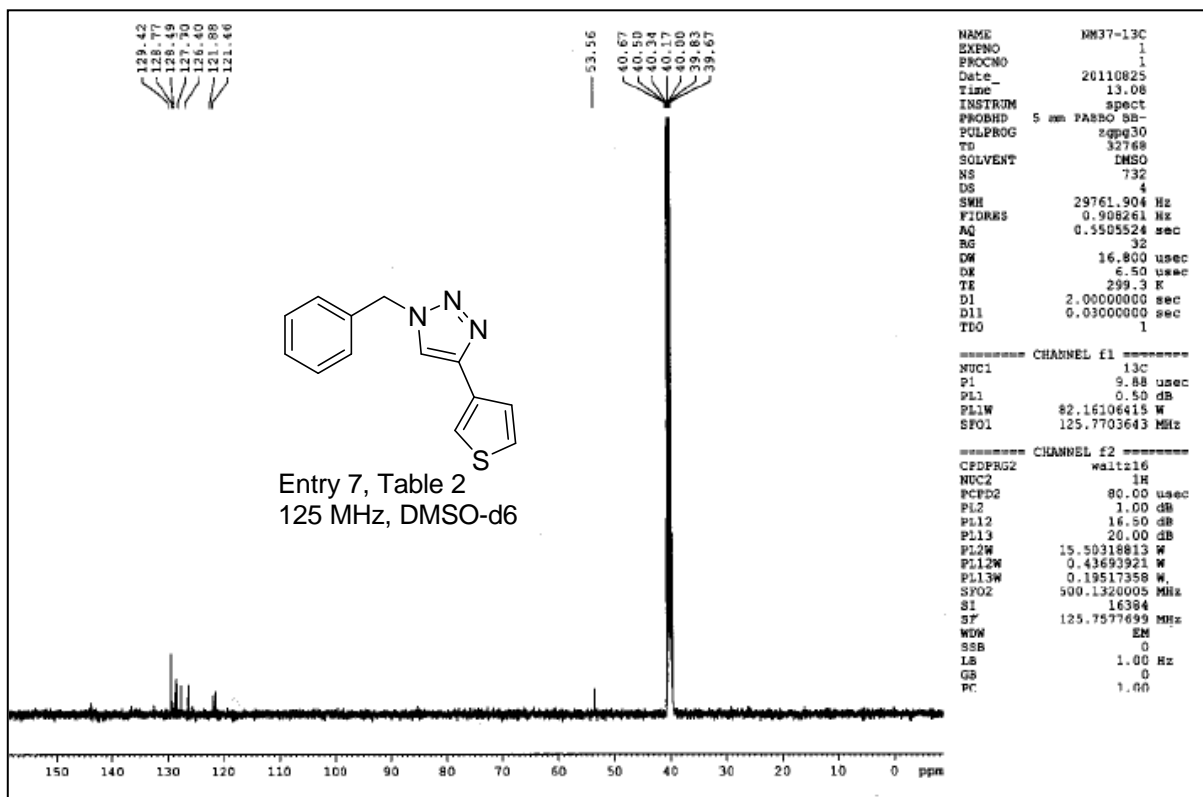

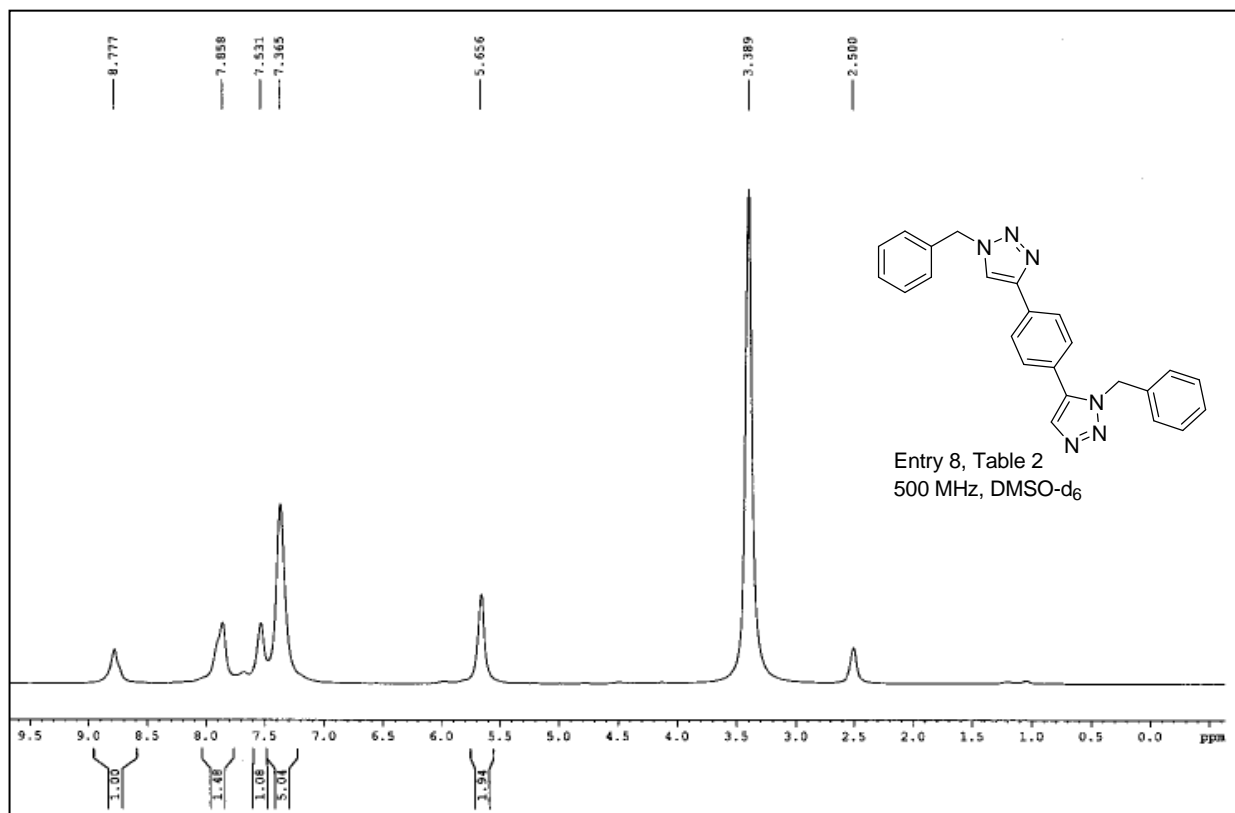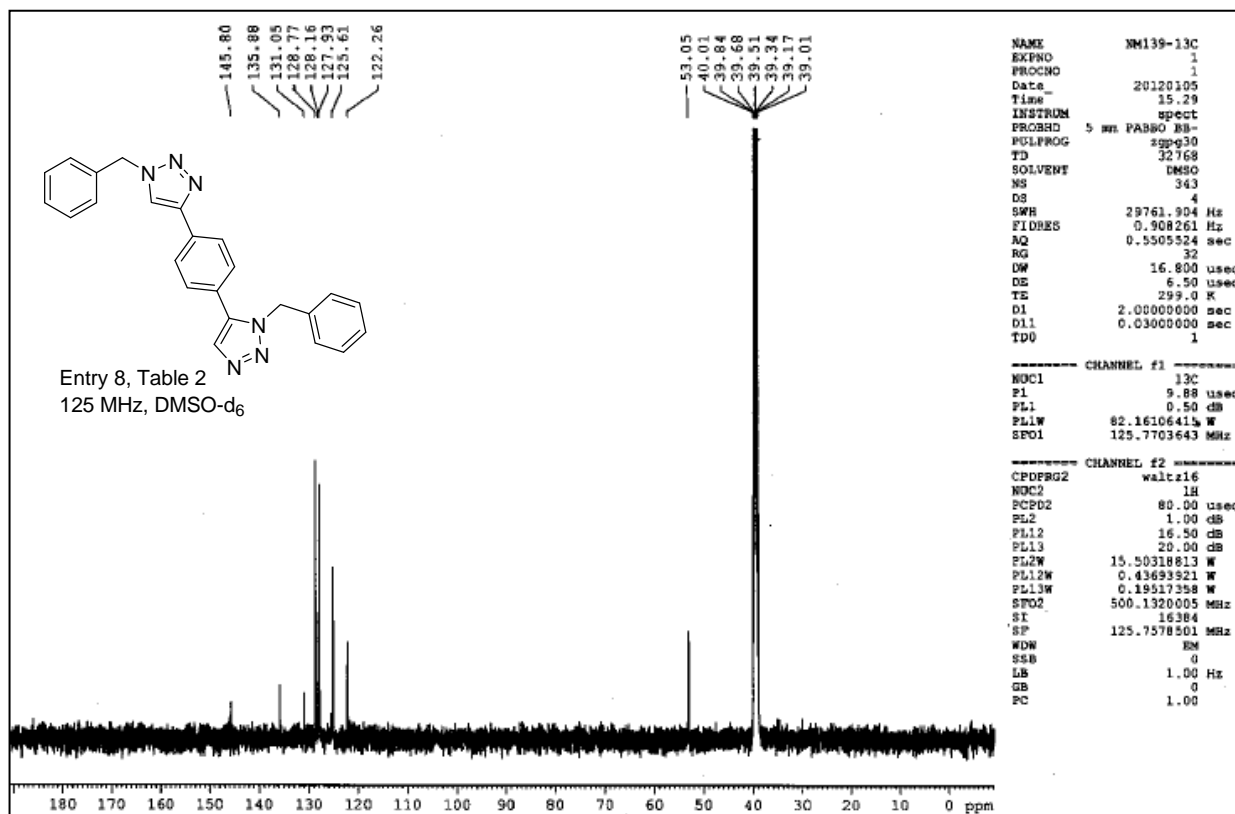

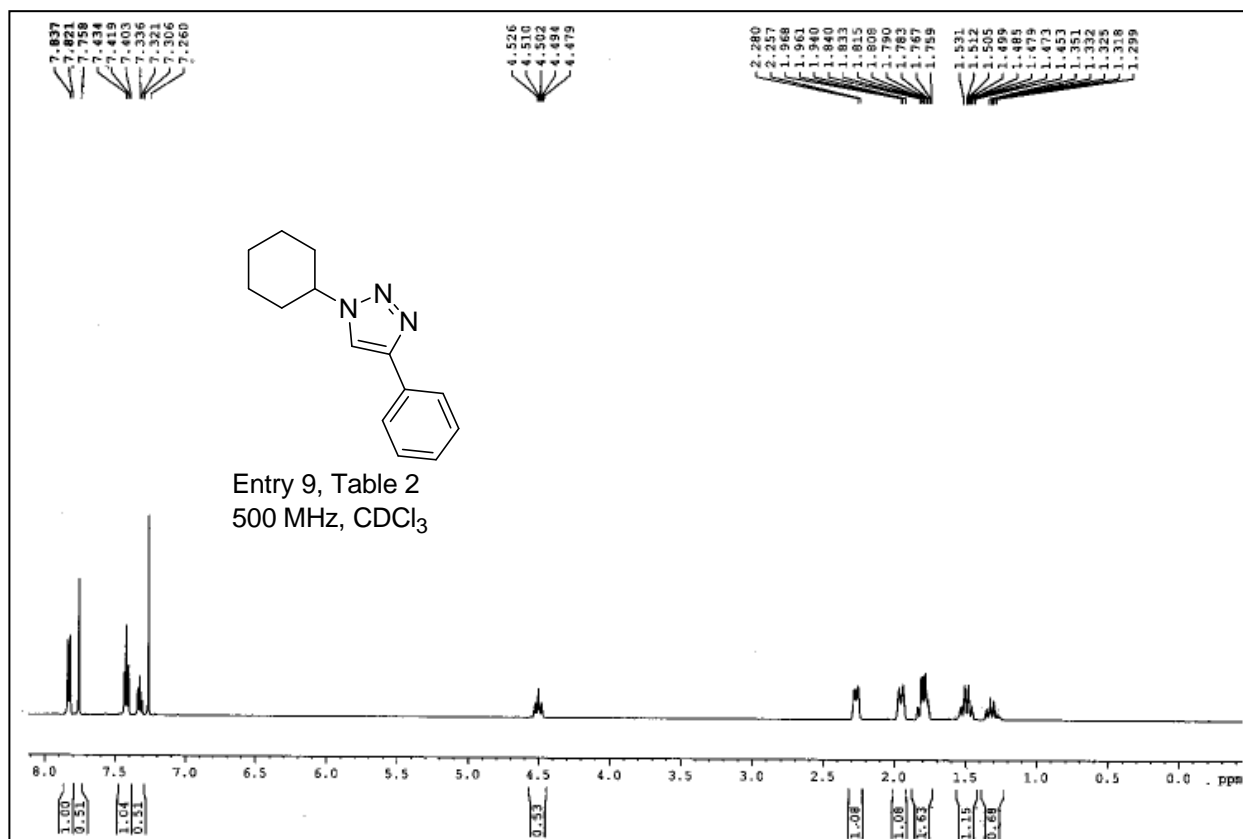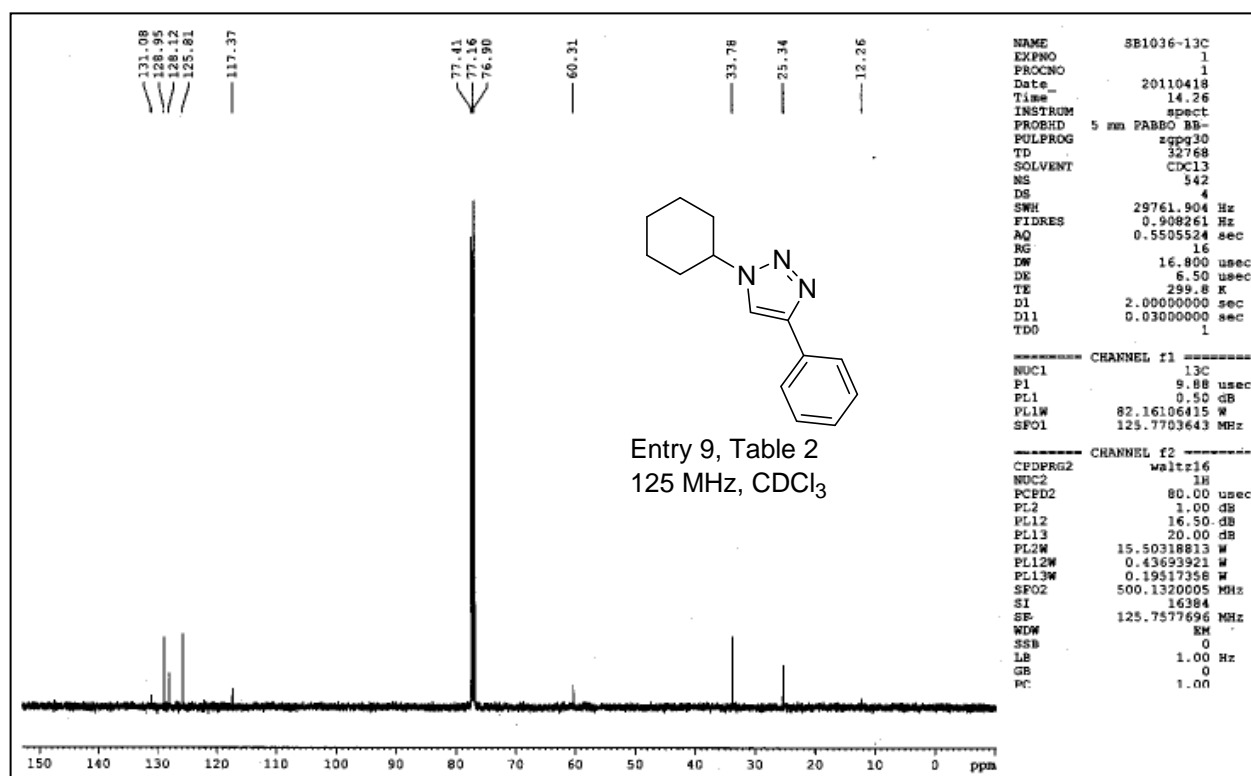

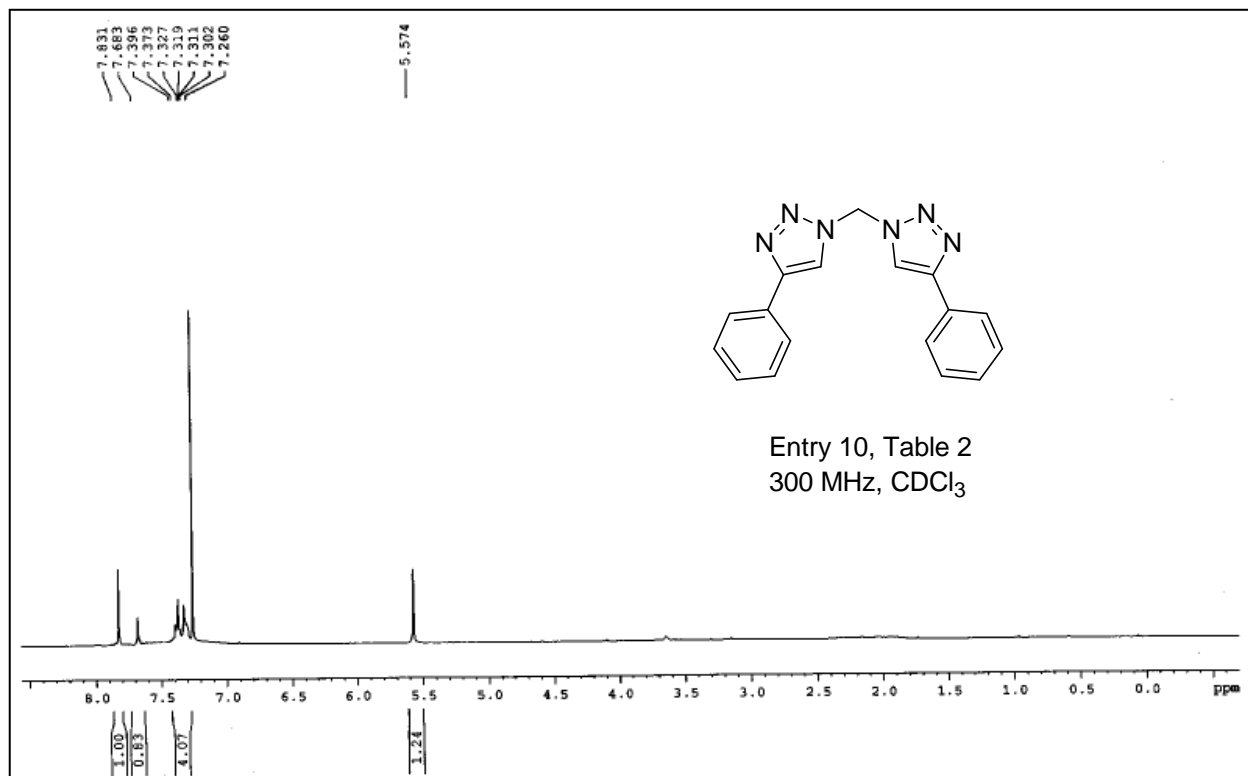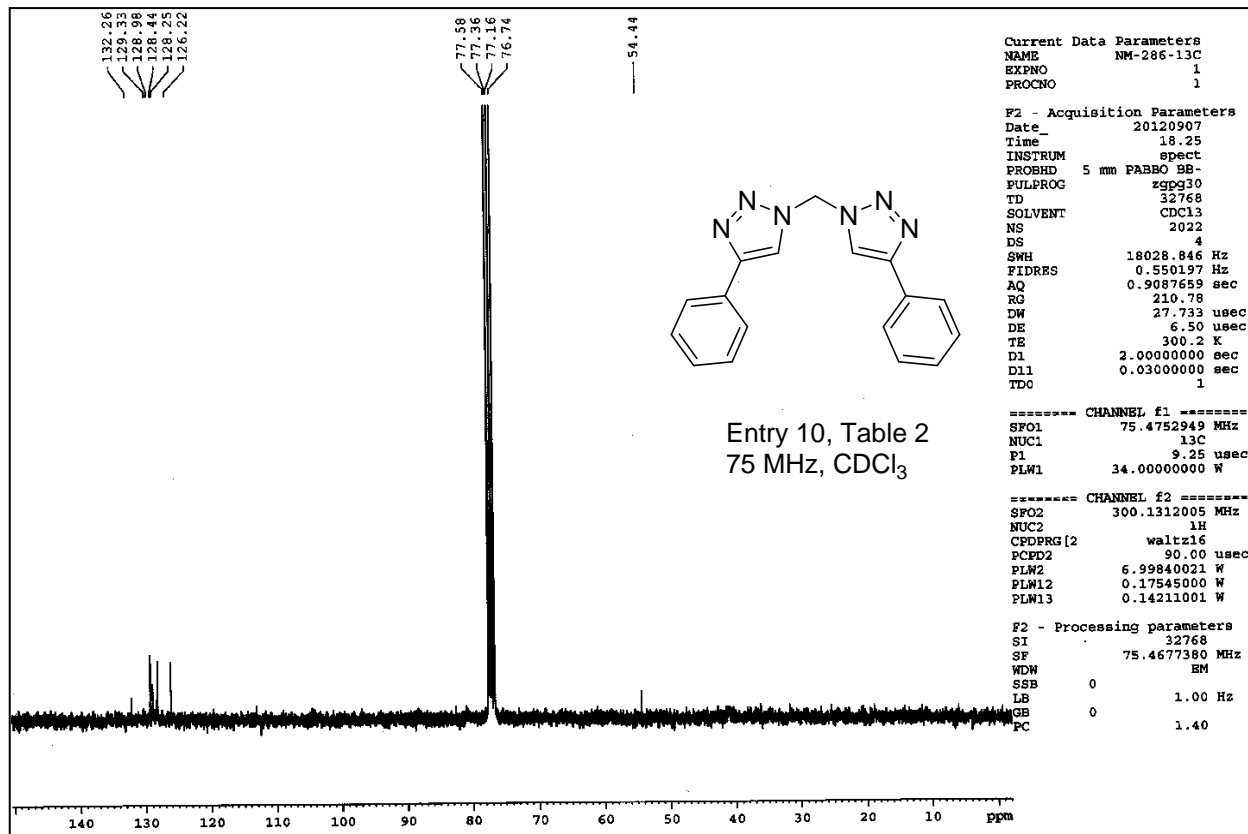

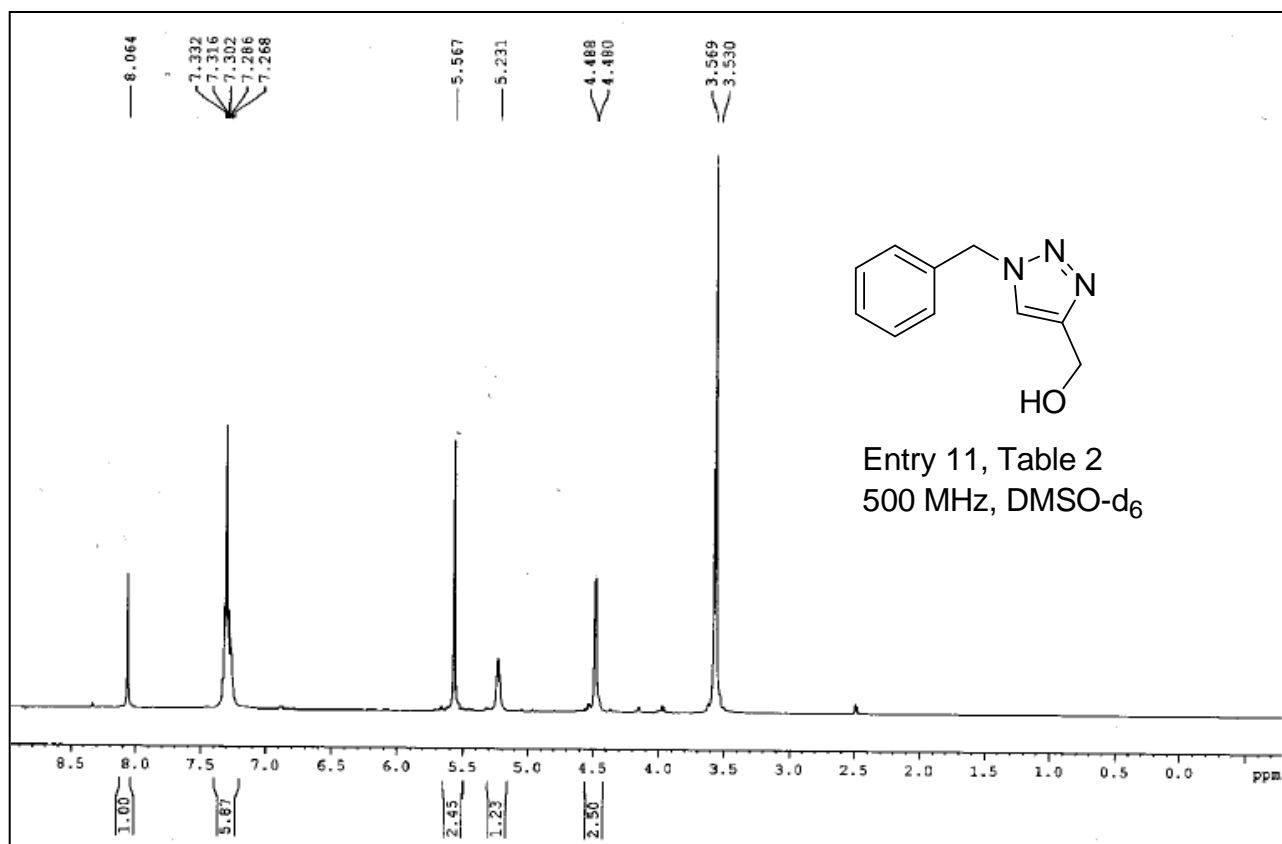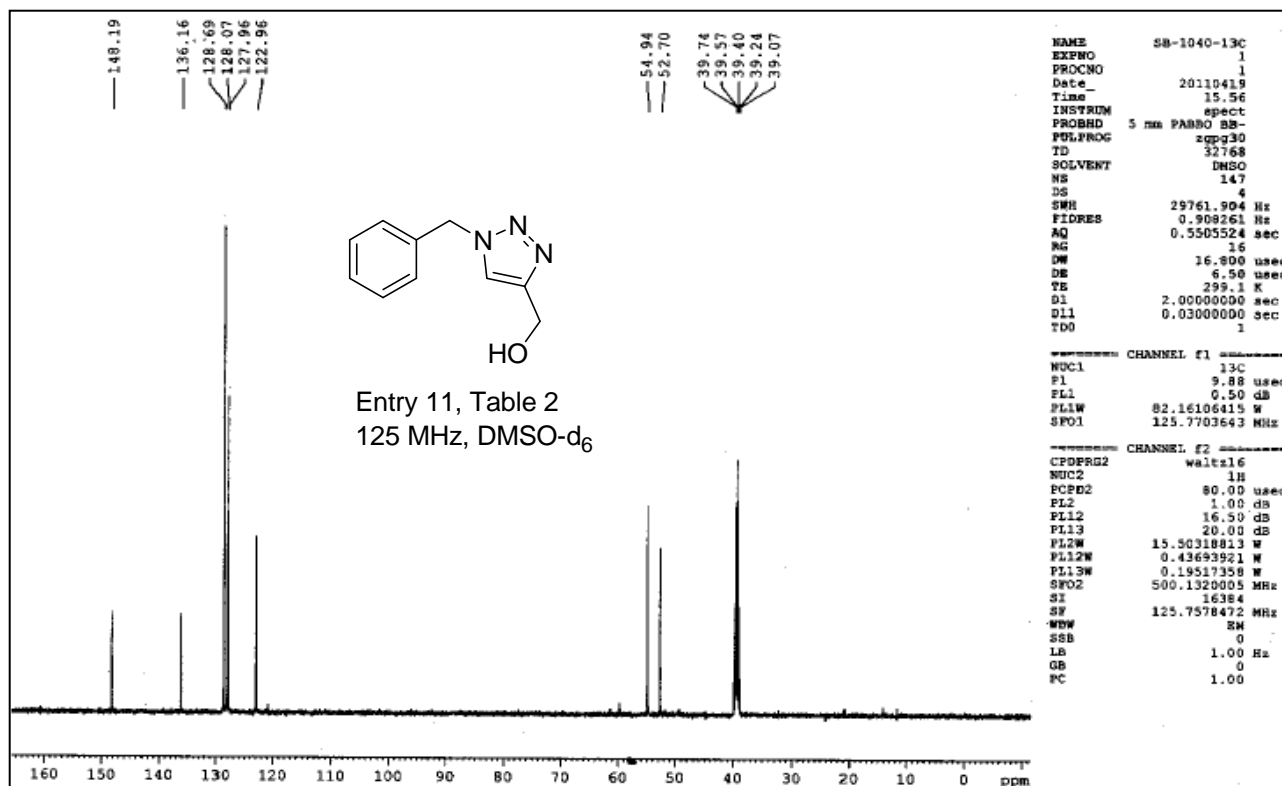

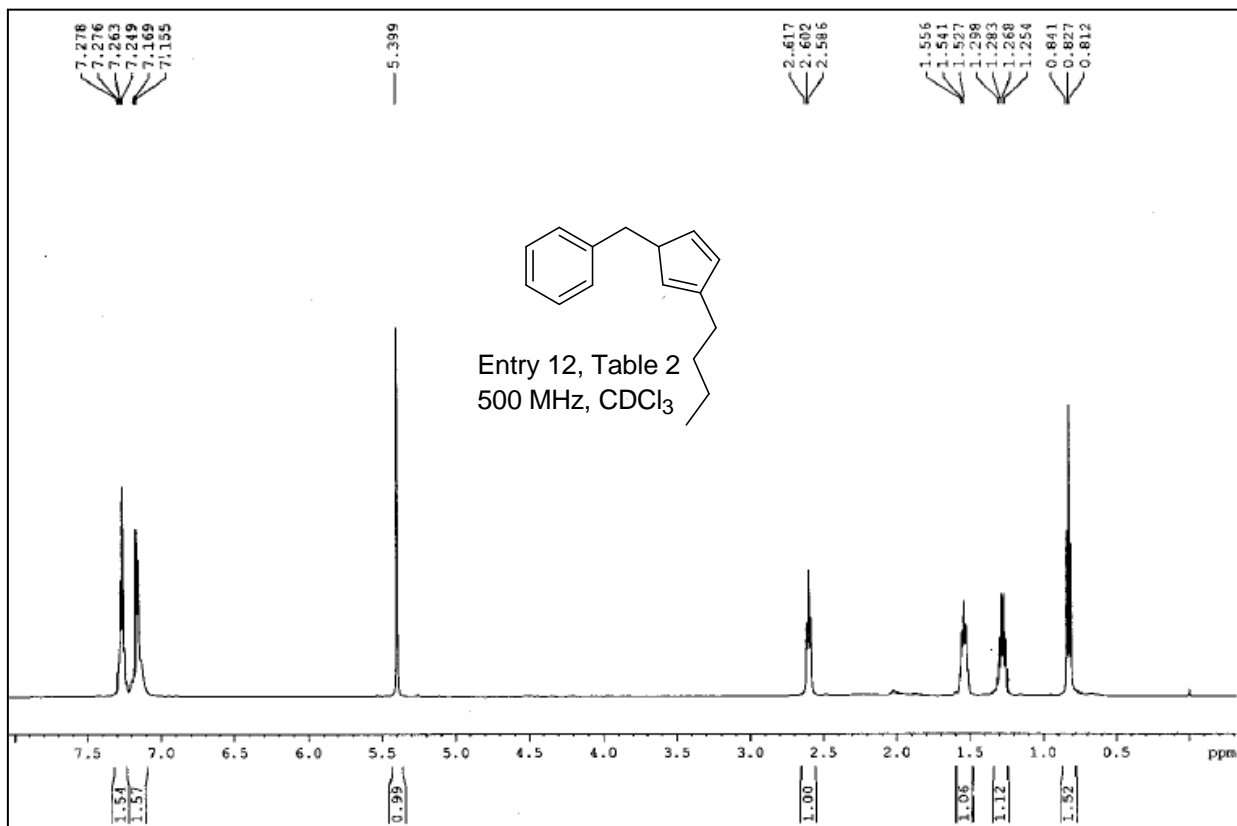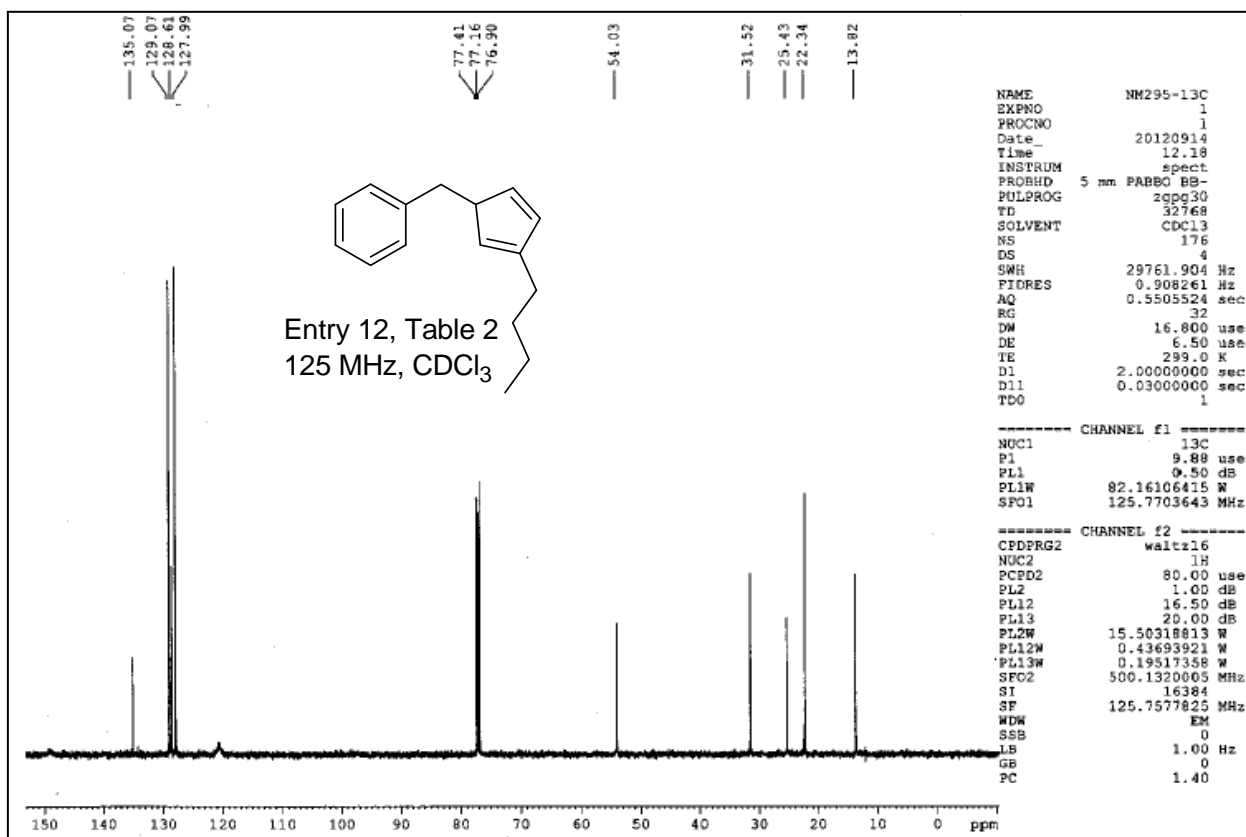

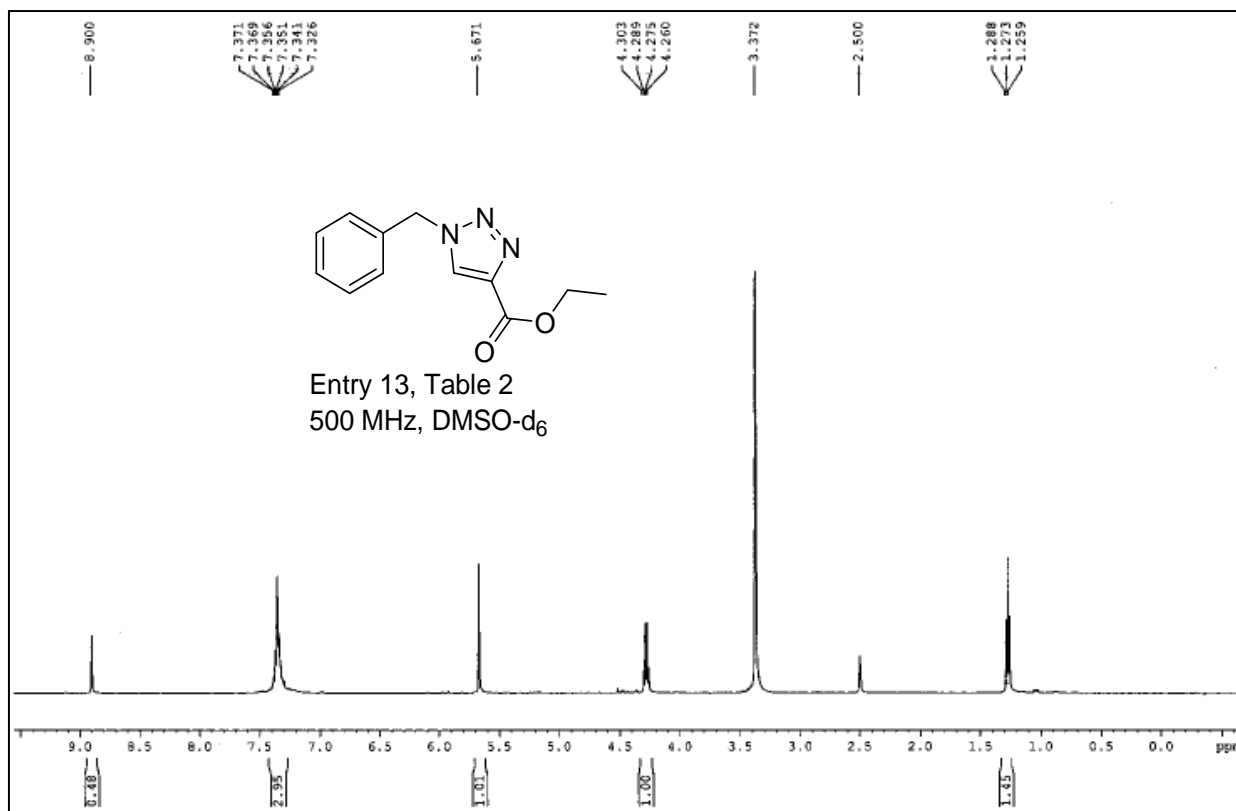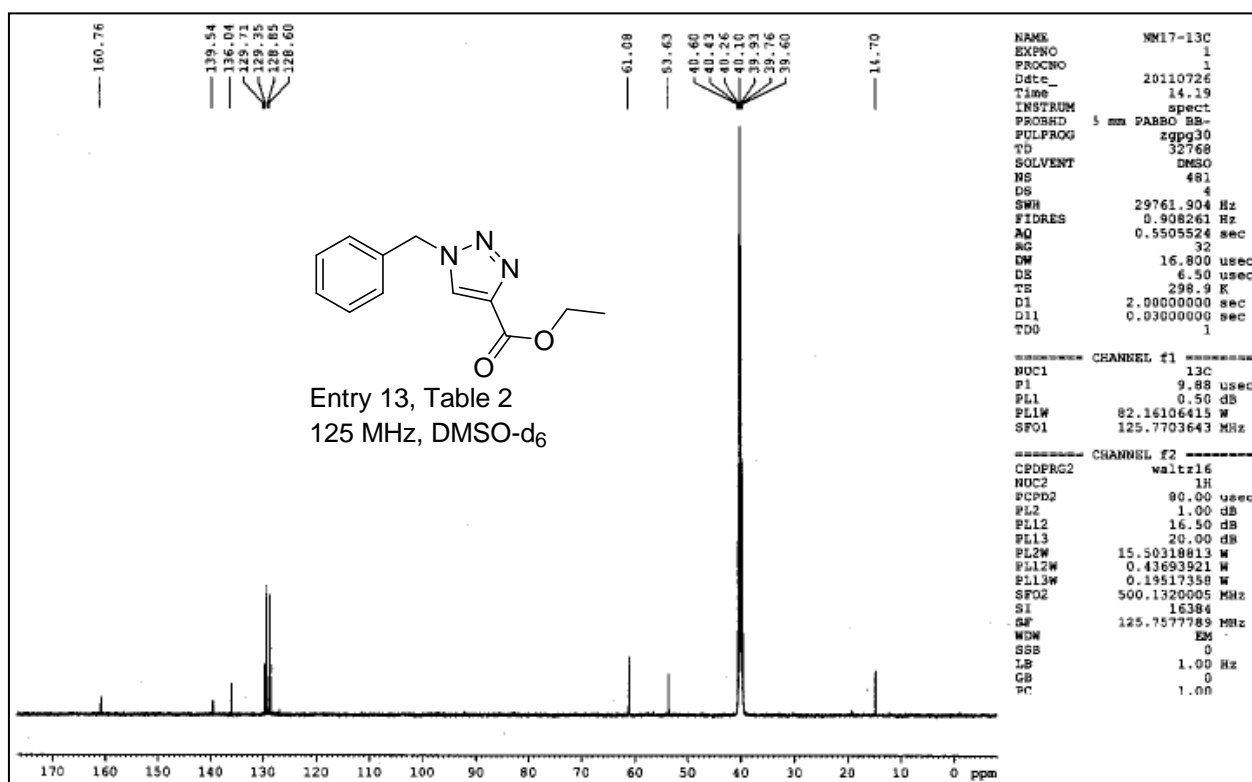



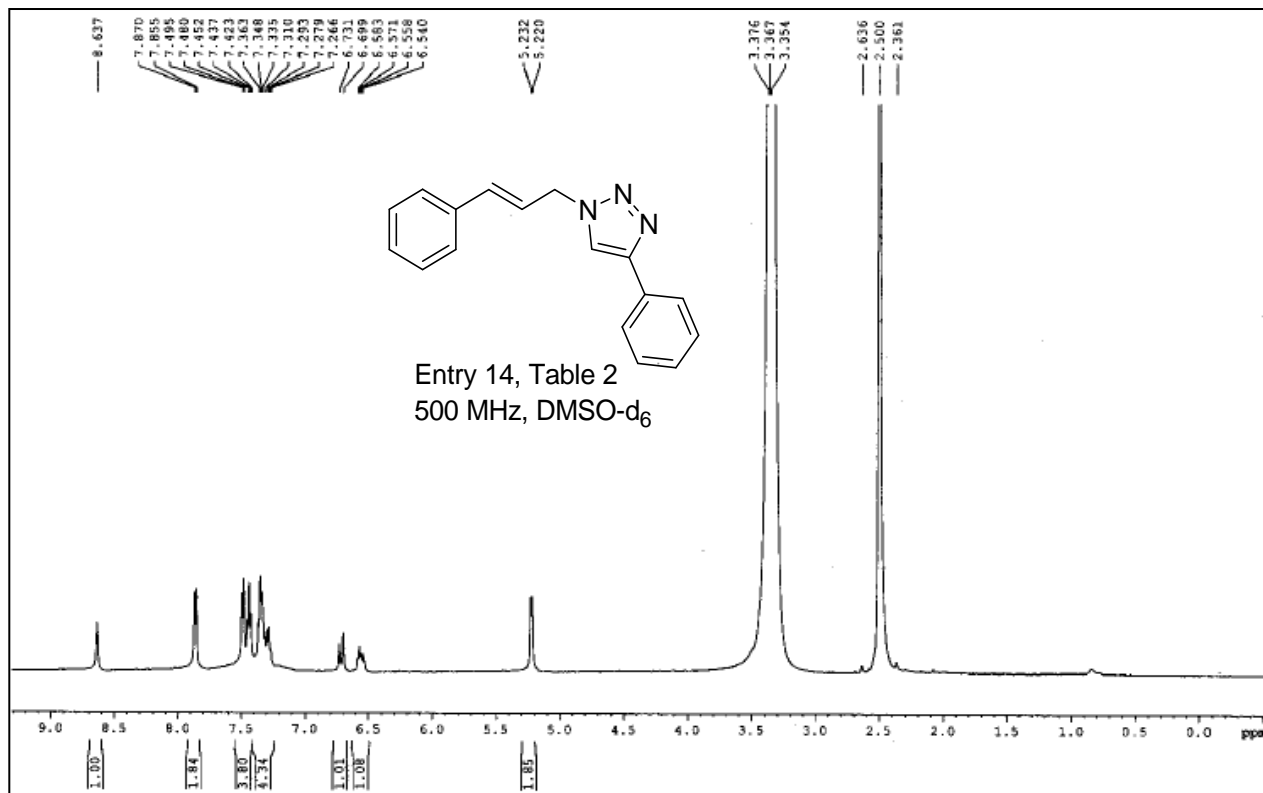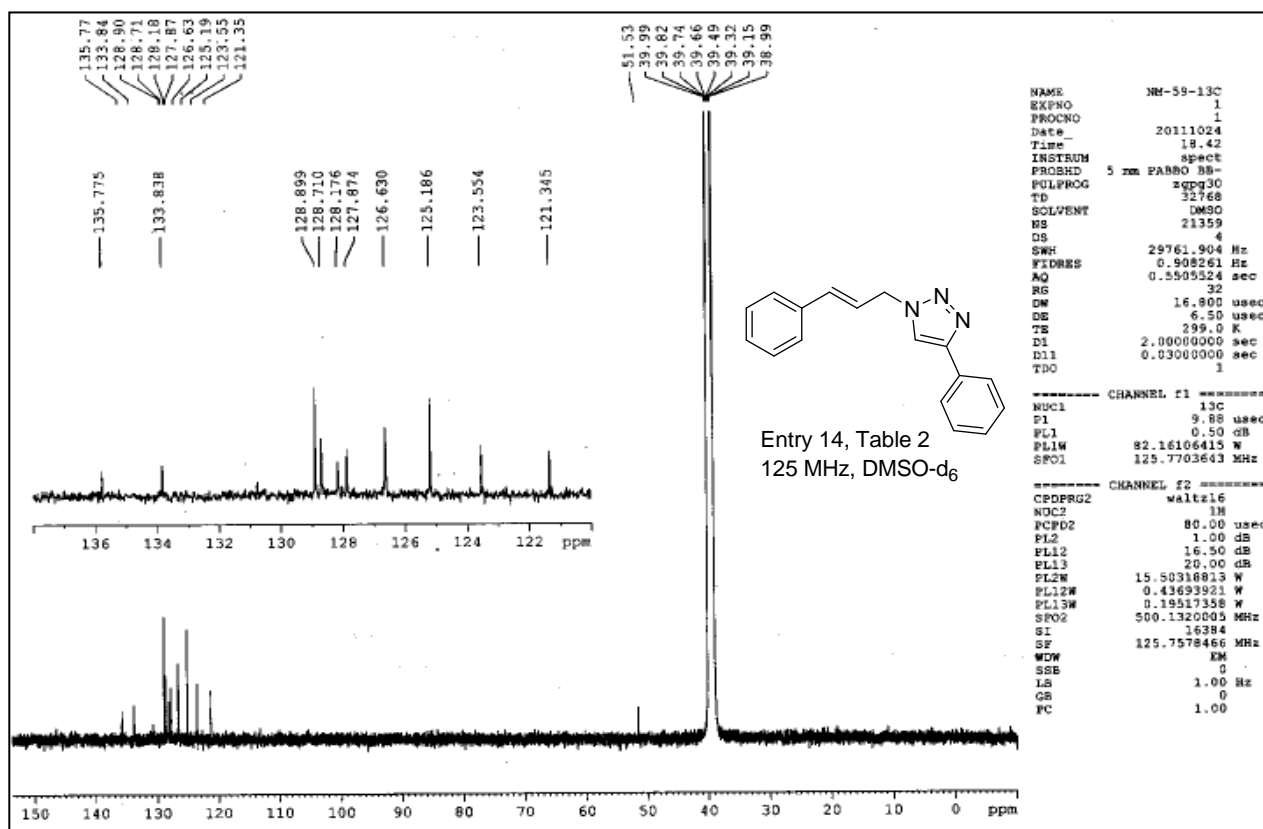

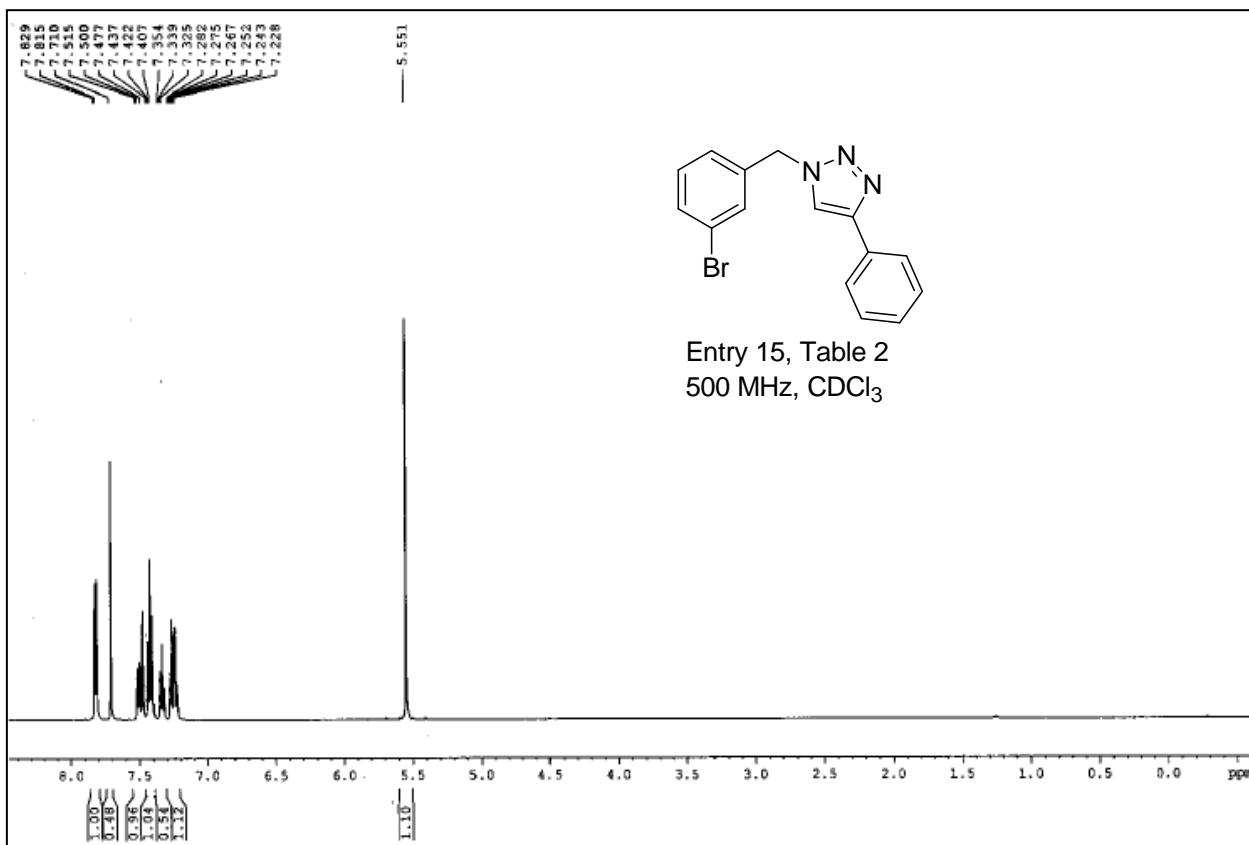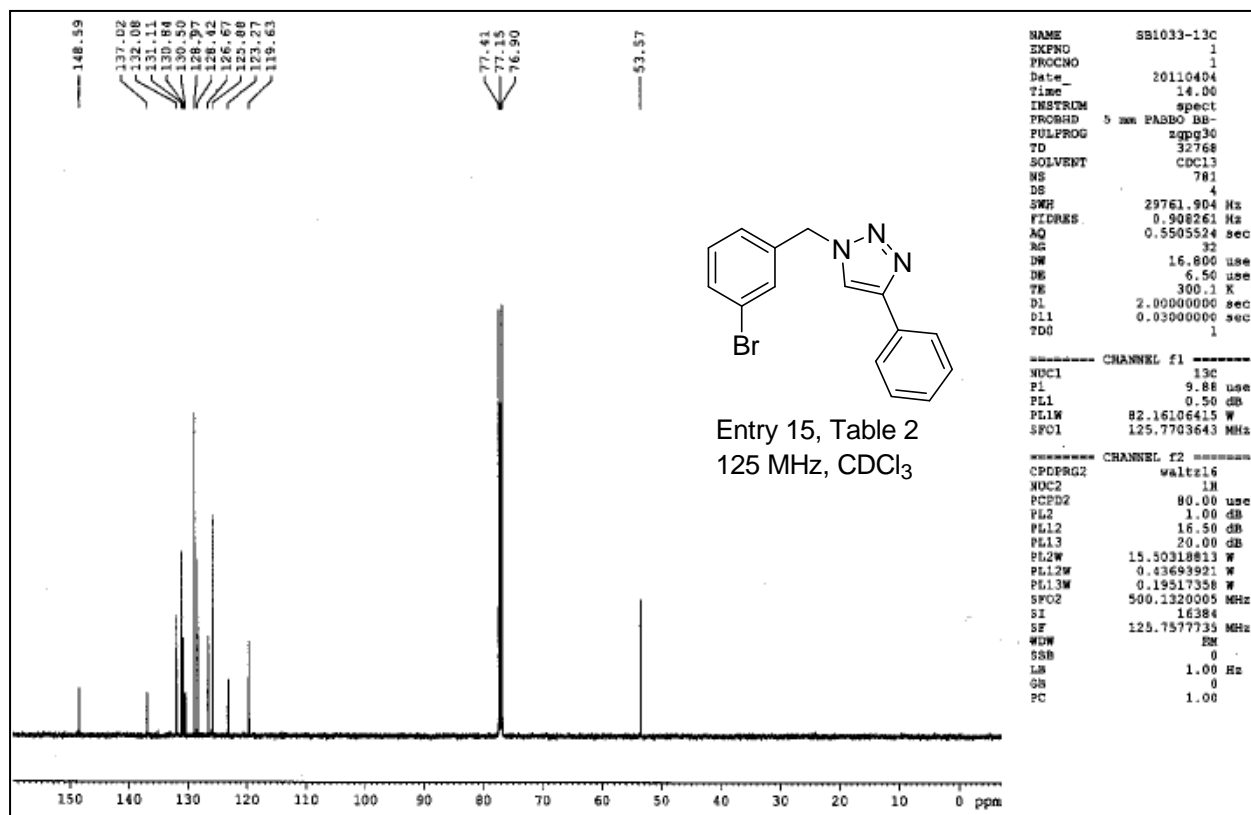

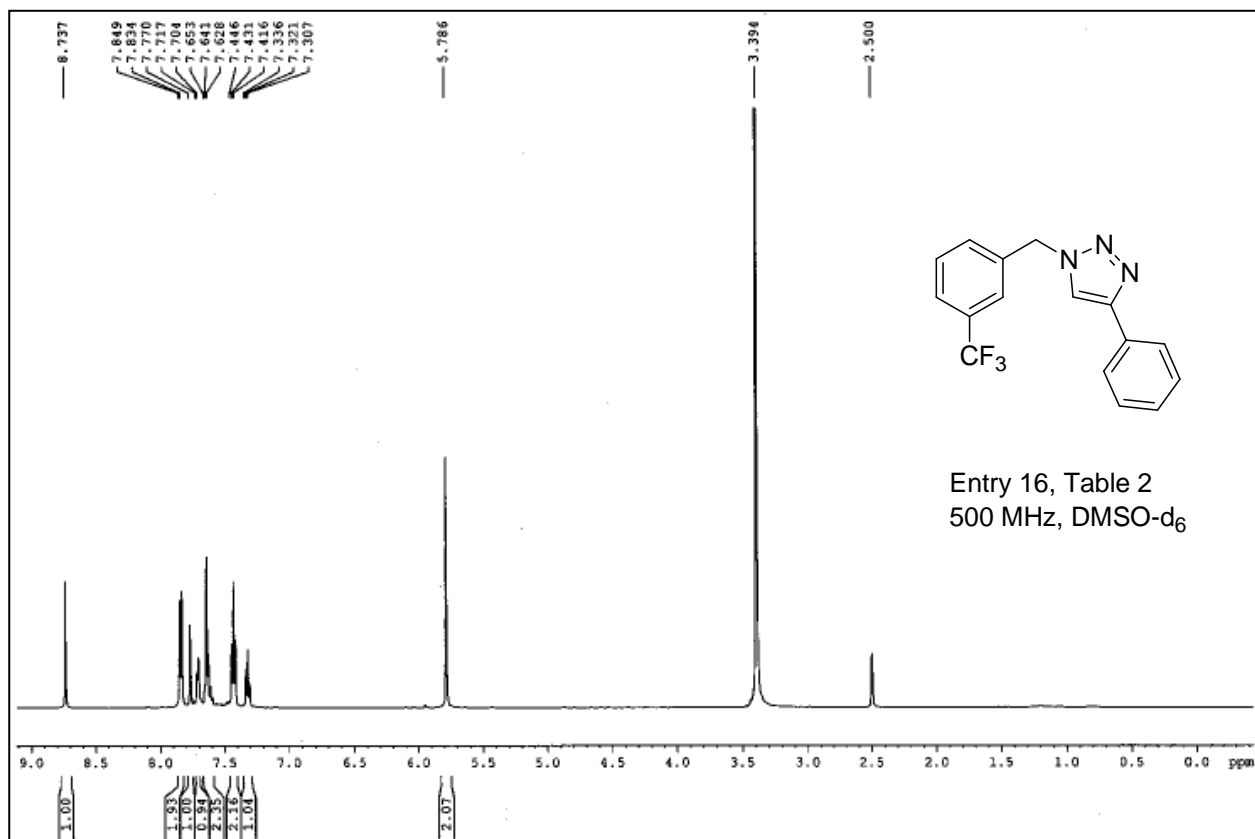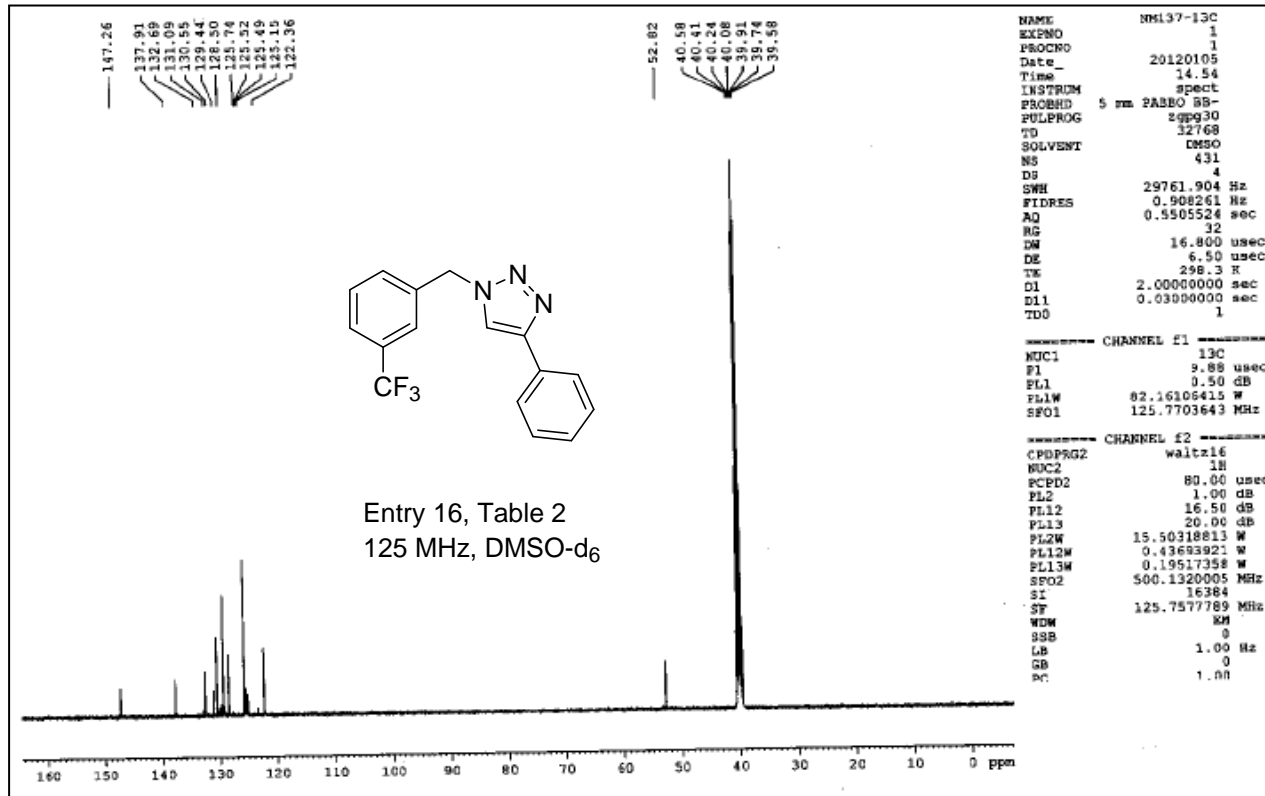

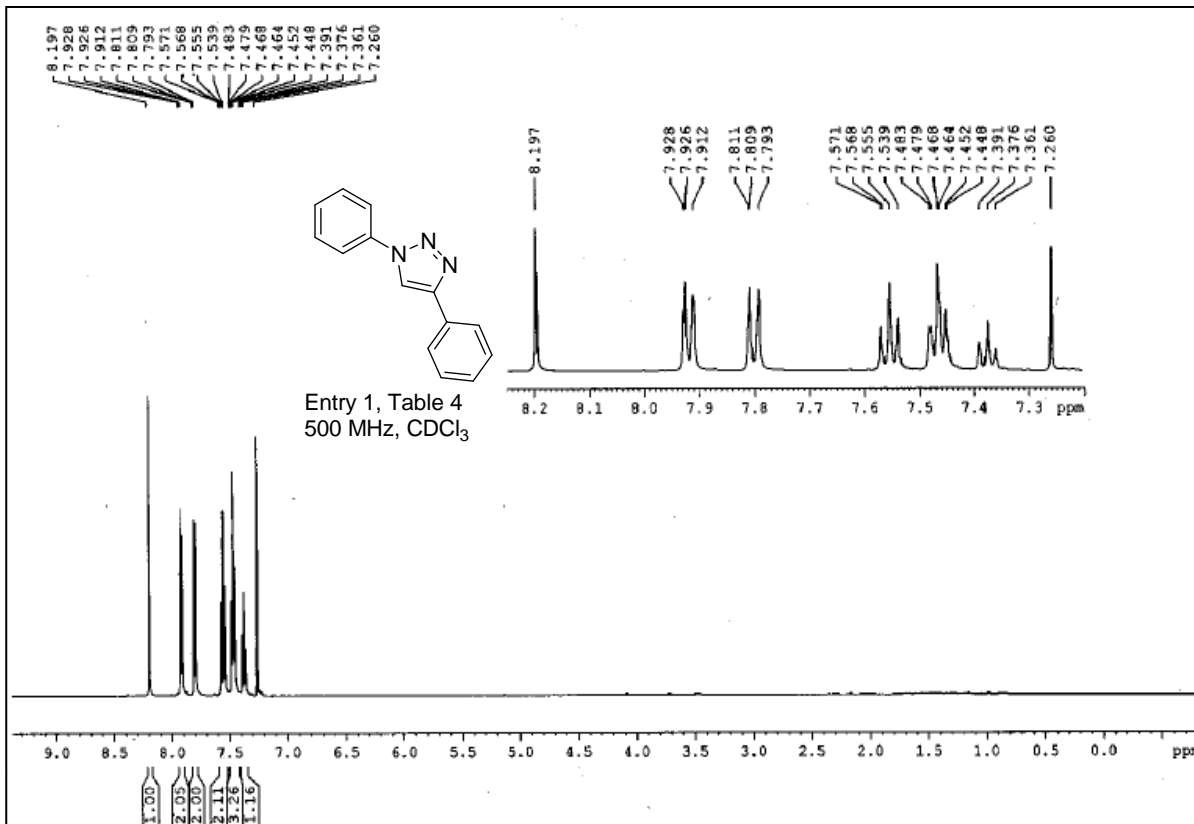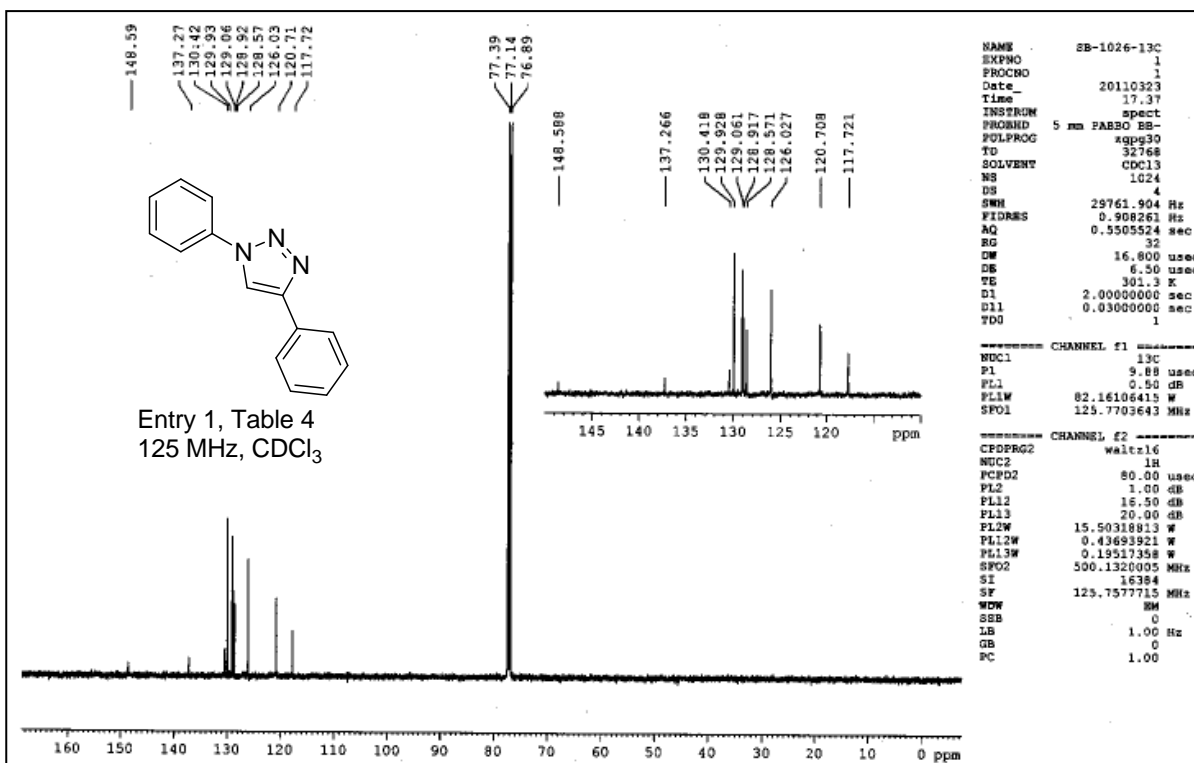

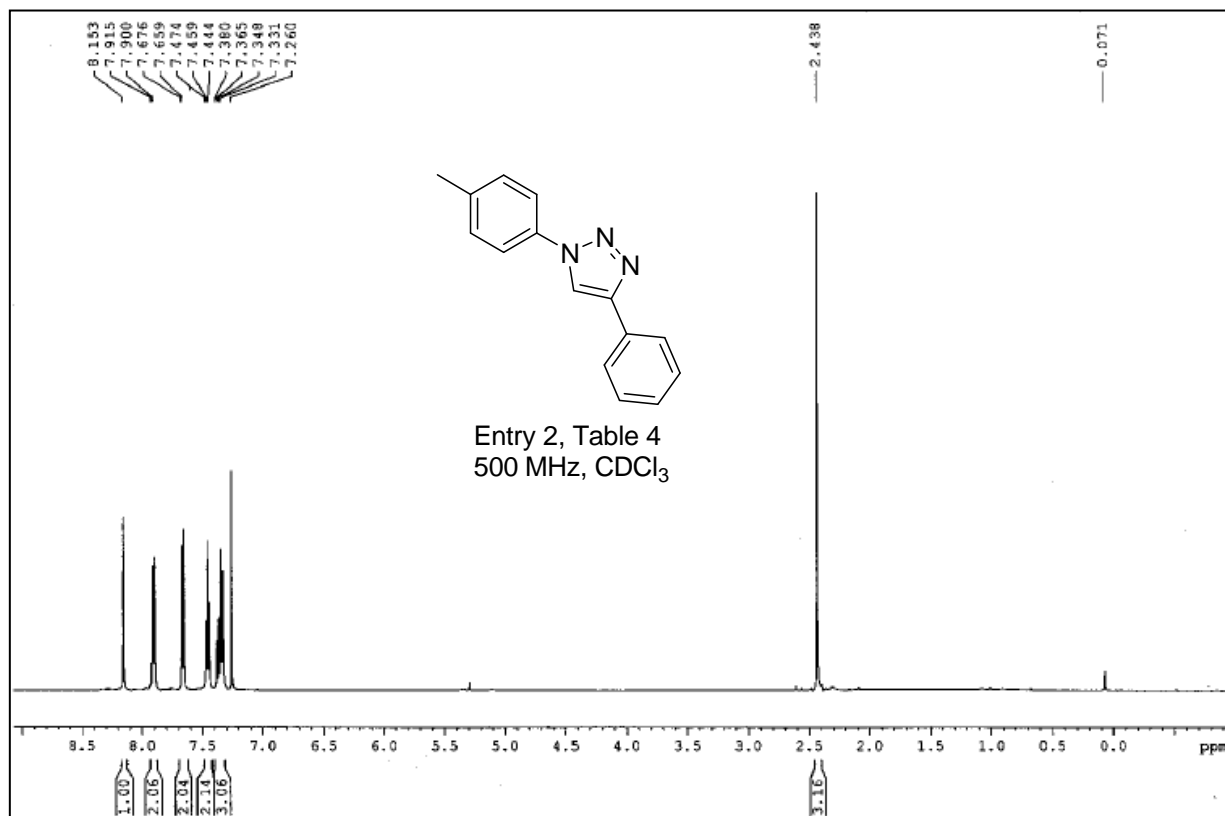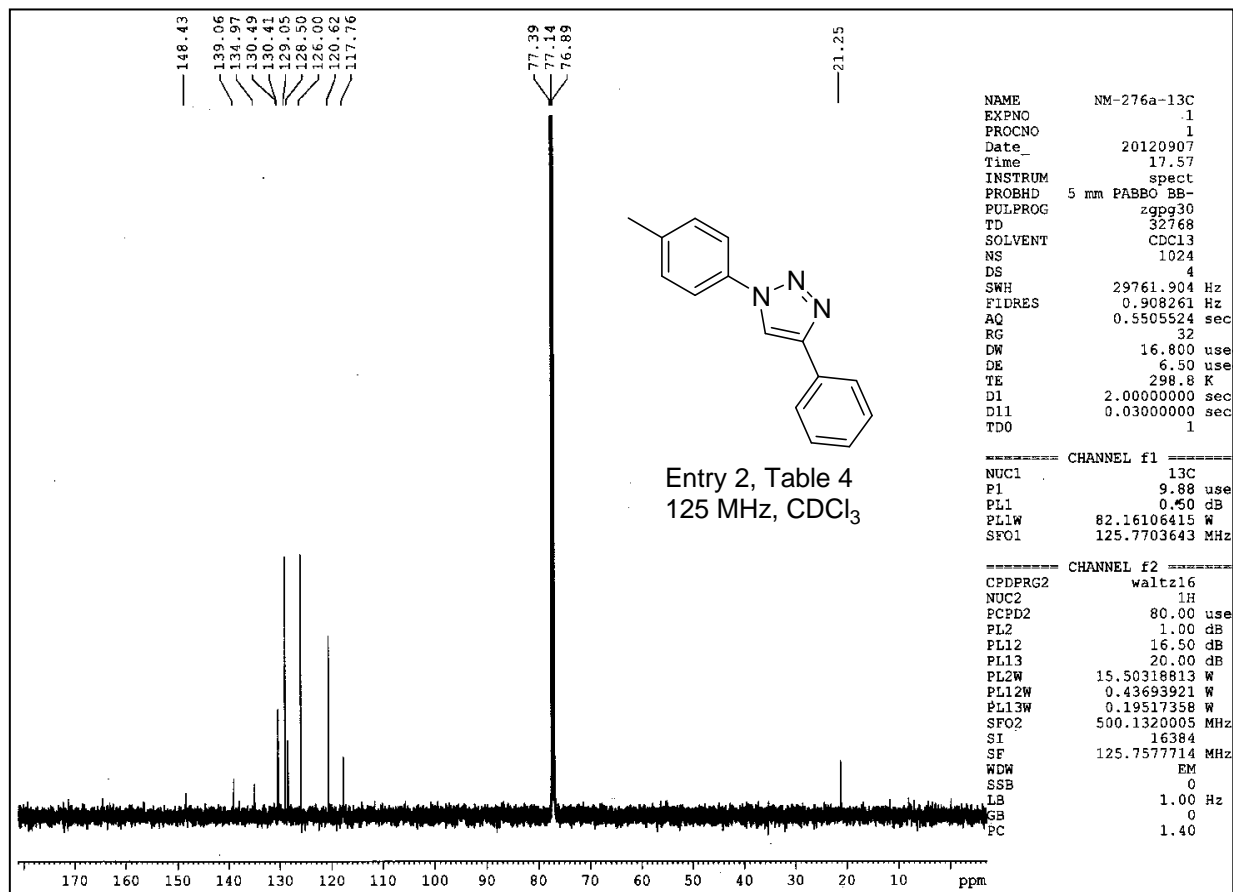

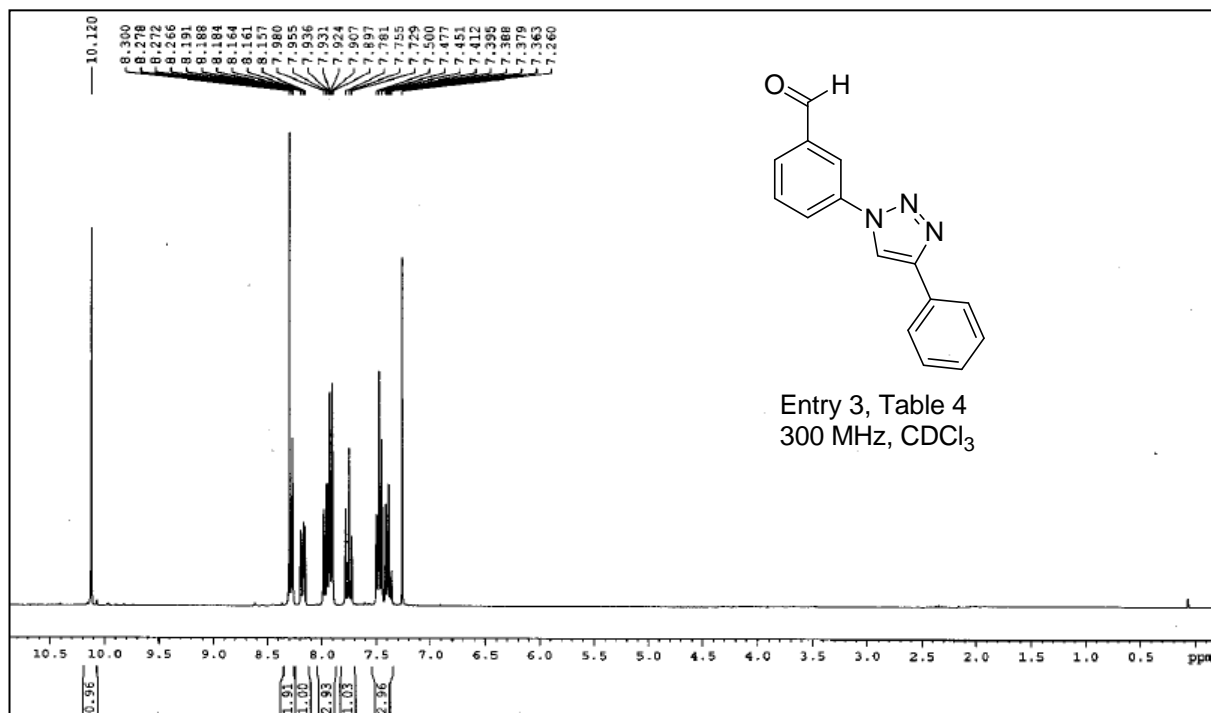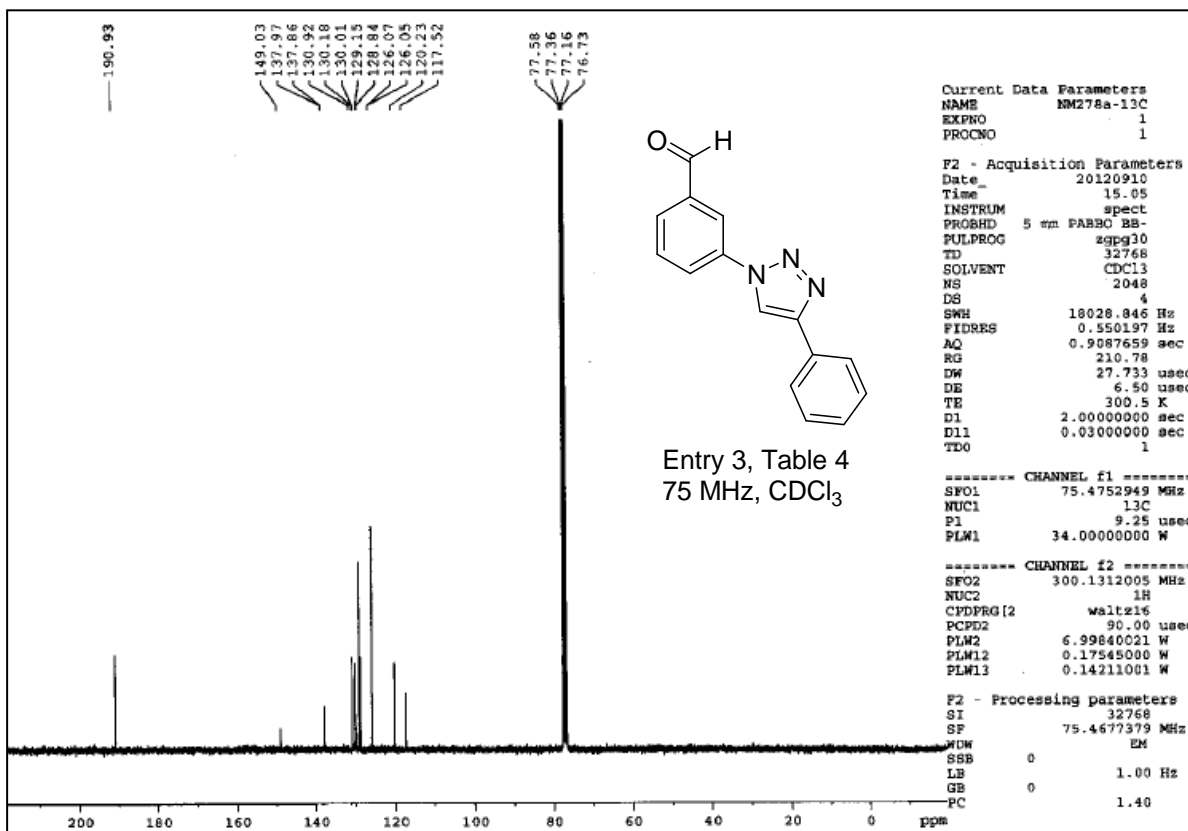

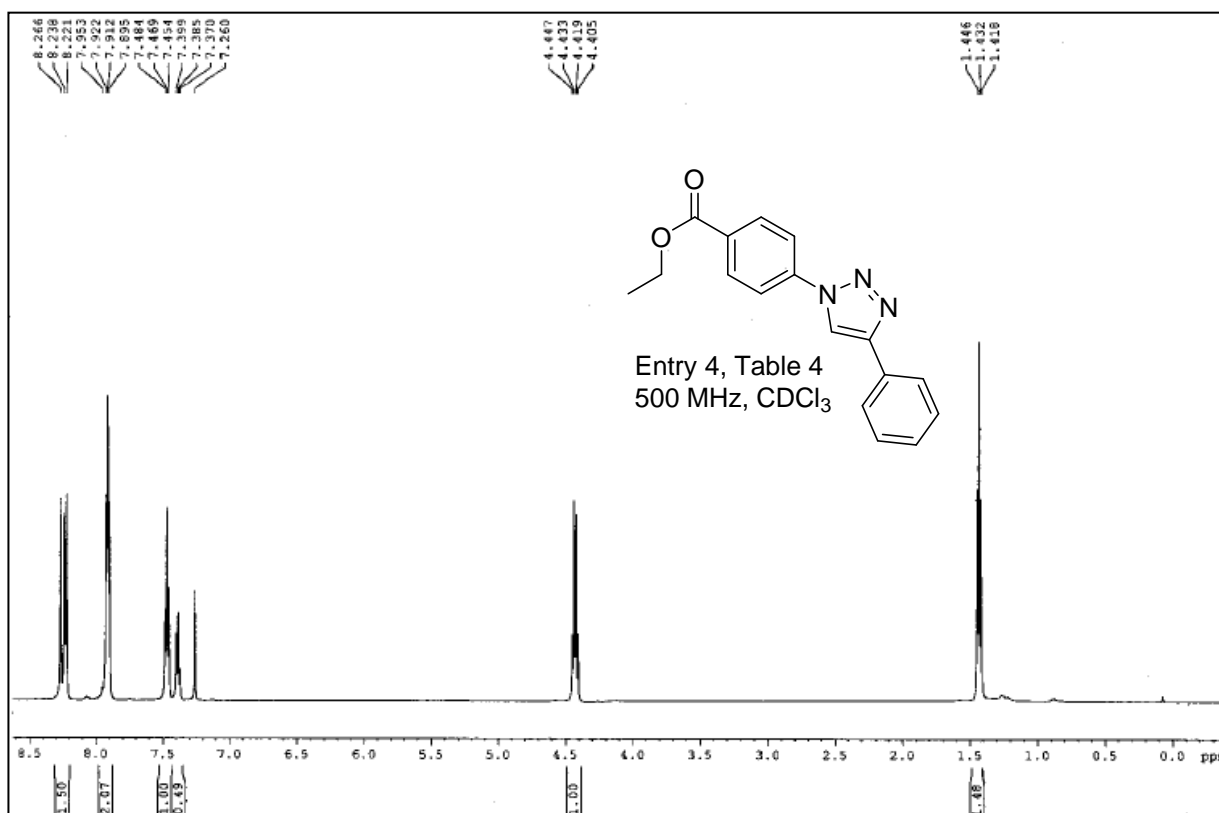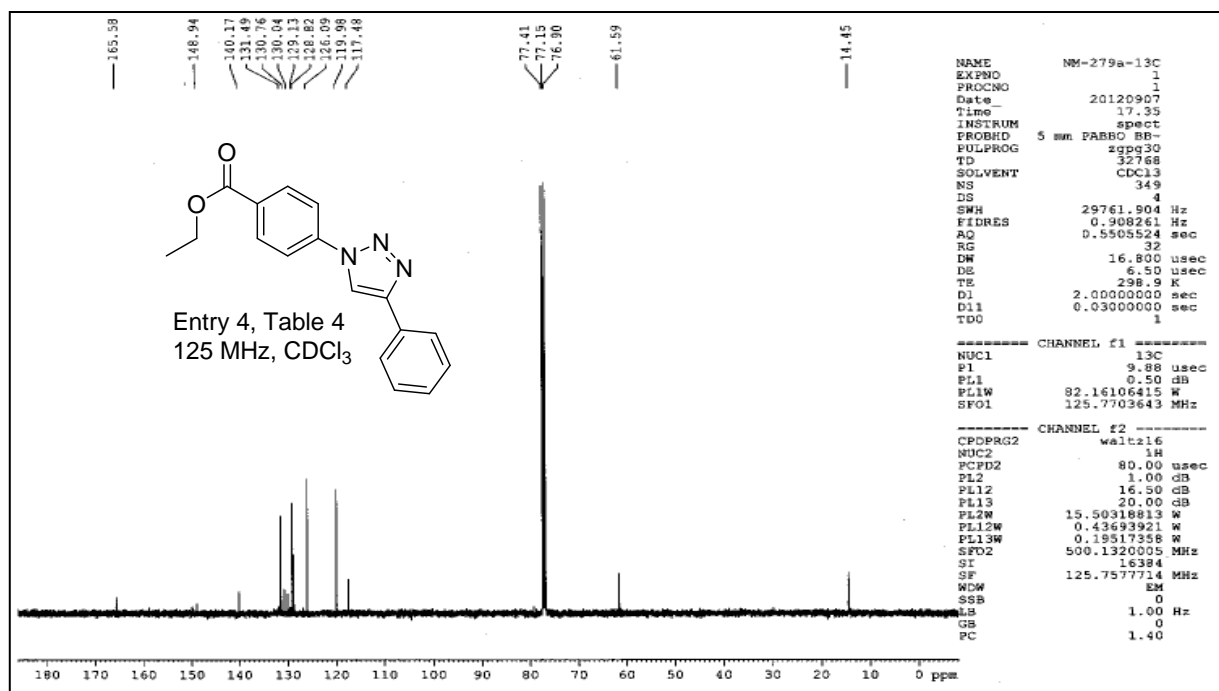

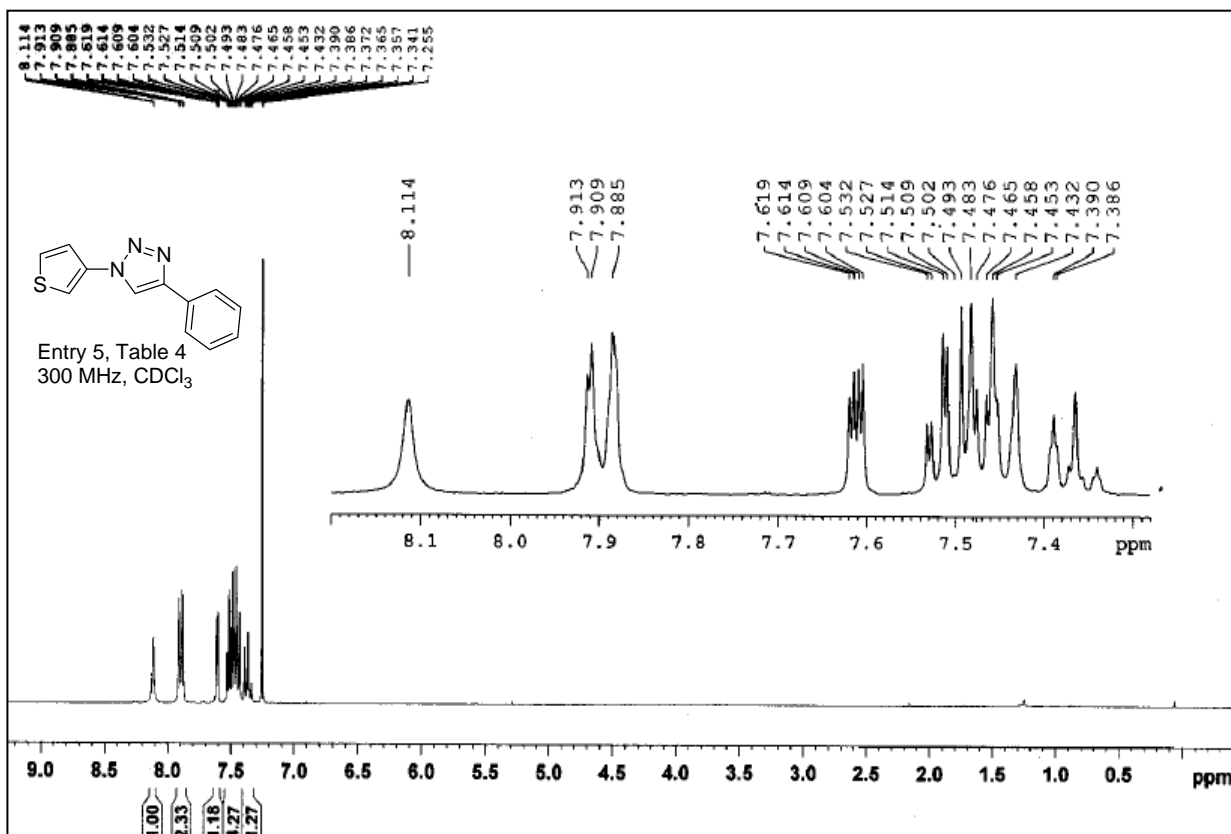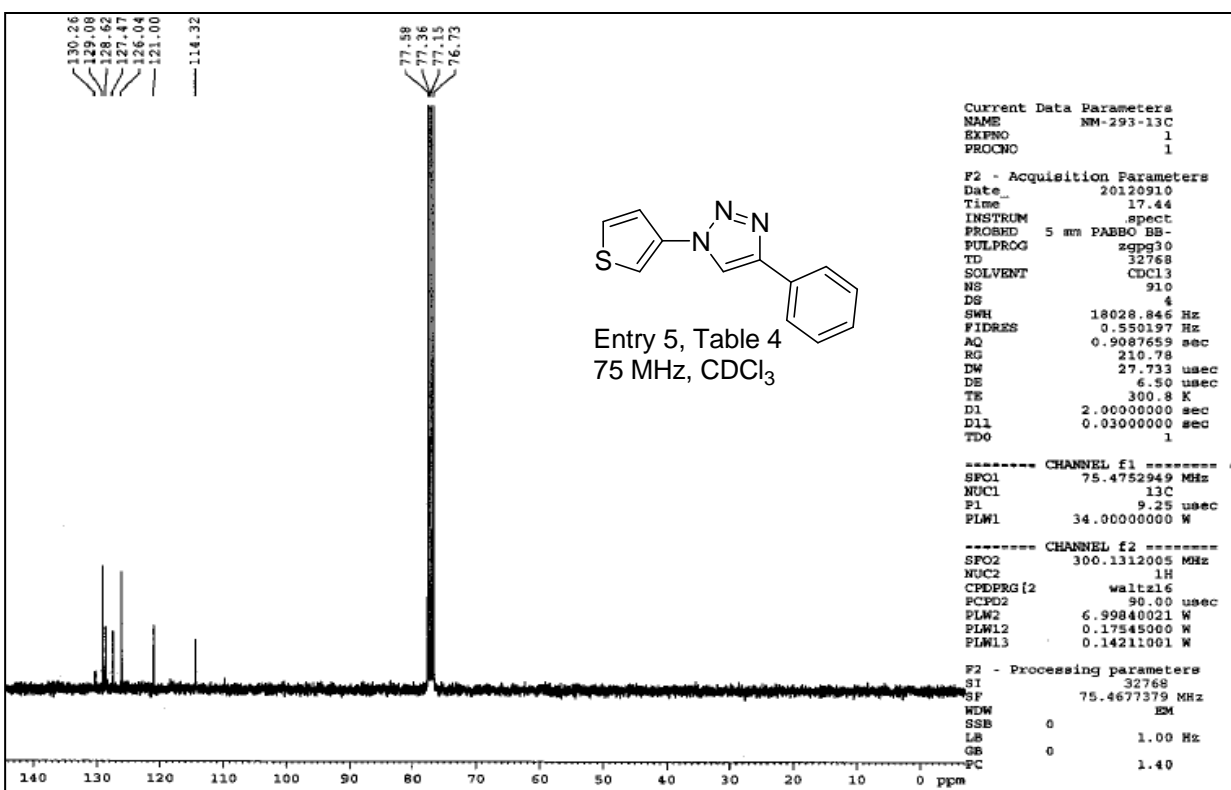



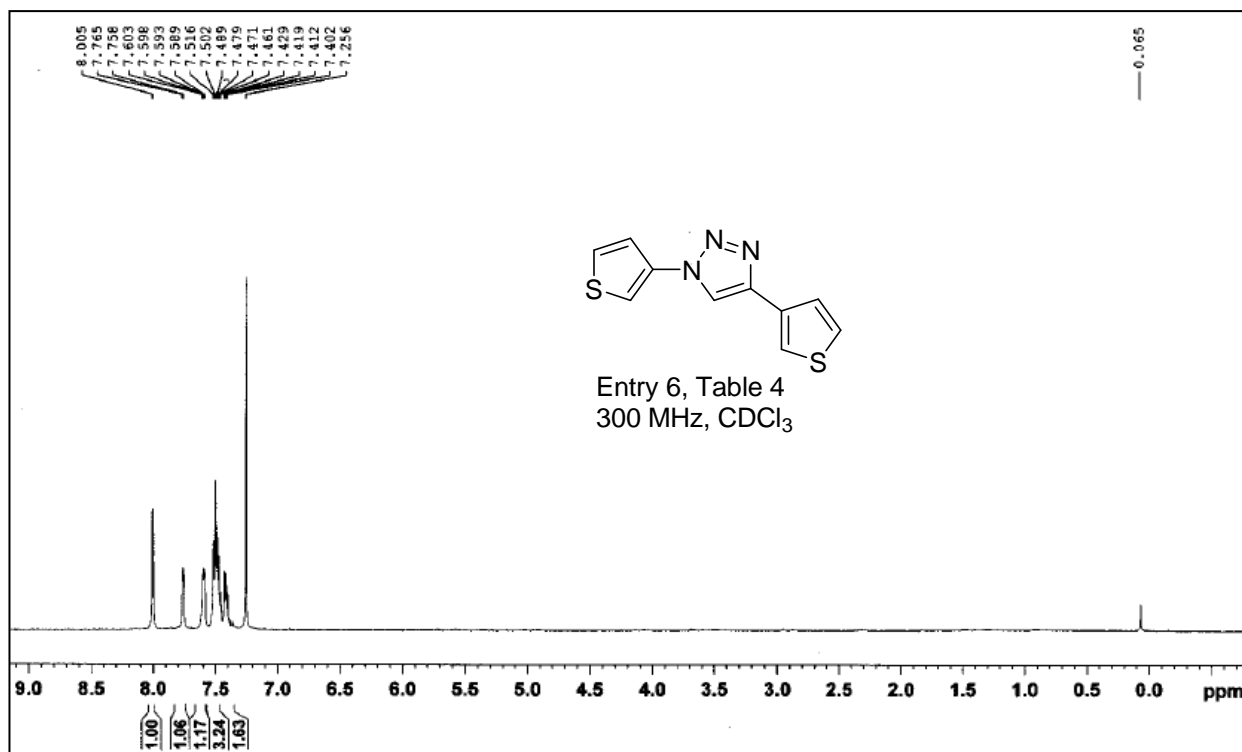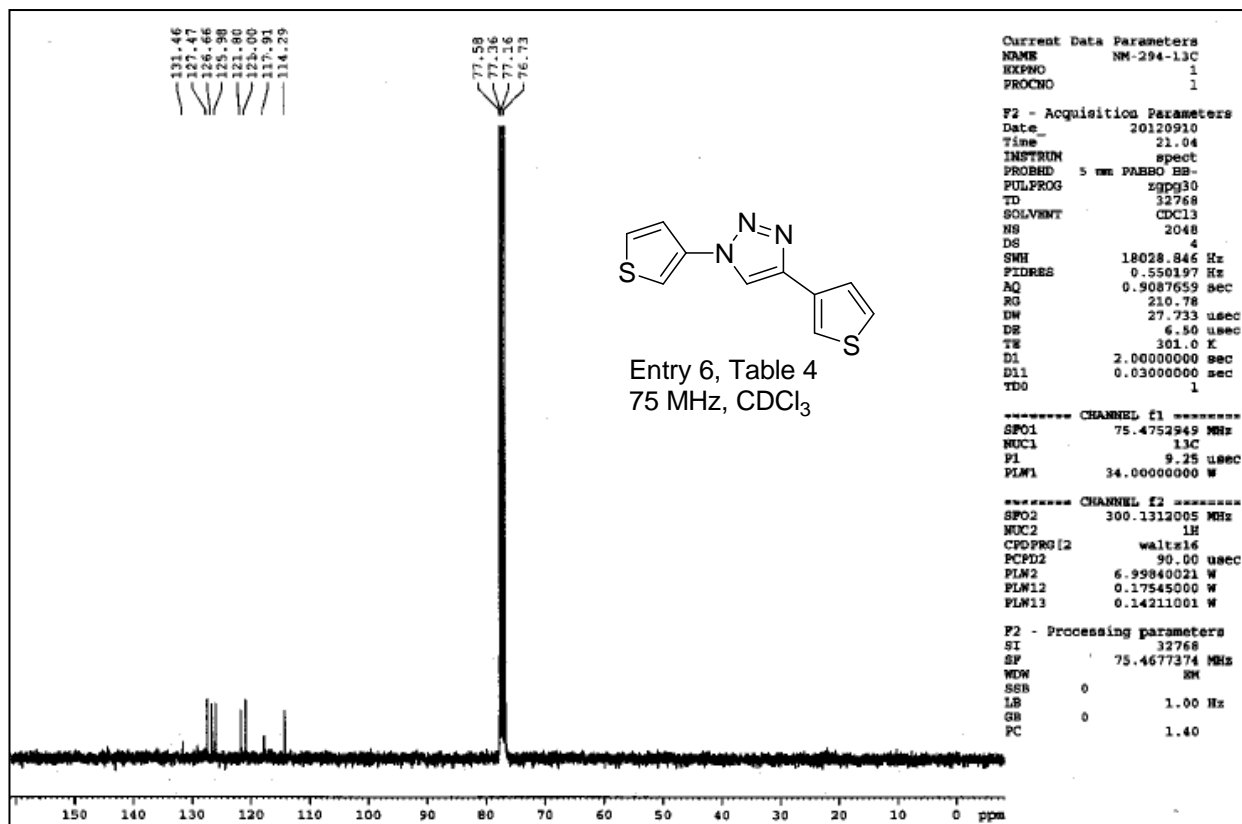

Current Data Parameters  
 NAME NM-294-13C  
 EXPNO 1  
 PROCNO 1

F2 - Acquisition Parameters  
 Date\_ 20120910  
 Time 21.04  
 INSTRUM spect  
 PROBRHD 5 mm PABBO BB-  
 PULPROG zgpg30  
 TD 32768  
 SOLVENT CDCl3  
 NS 2048  
 DS 4  
 SWH 18028.846 Hz  
 FIDRES 0.550197 Hz  
 AQ 0.9087659 sec  
 RG 210.78  
 DW 27.733 usec  
 DE 6.50 usec  
 TE 301.0 K  
 D1 2.0000000 sec  
 D11 0.03000000 sec  
 TDO 1

----- CHANNEL f1 -----  
 SFO1 75.4752945 MHz  
 NUC1 13C  
 P1 9.25 usec  
 PLW1 34.00000000 W

----- CHANNEL f2 -----  
 SFO2 300.1312005 MHz  
 NUC2 1H  
 CPOPRG12 waltz16  
 PCPD2 90.00 usec  
 PLW2 6.99840021 W  
 PLW12 0.17545000 W  
 PLW13 0.14211001 W

F2 - Processing parameters  
 SI 32768  
 SF 75.4677374 MHz  
 WDW RM  
 SSB 0  
 LB 1.00 Hz  
 GB 0  
 GR 1.40

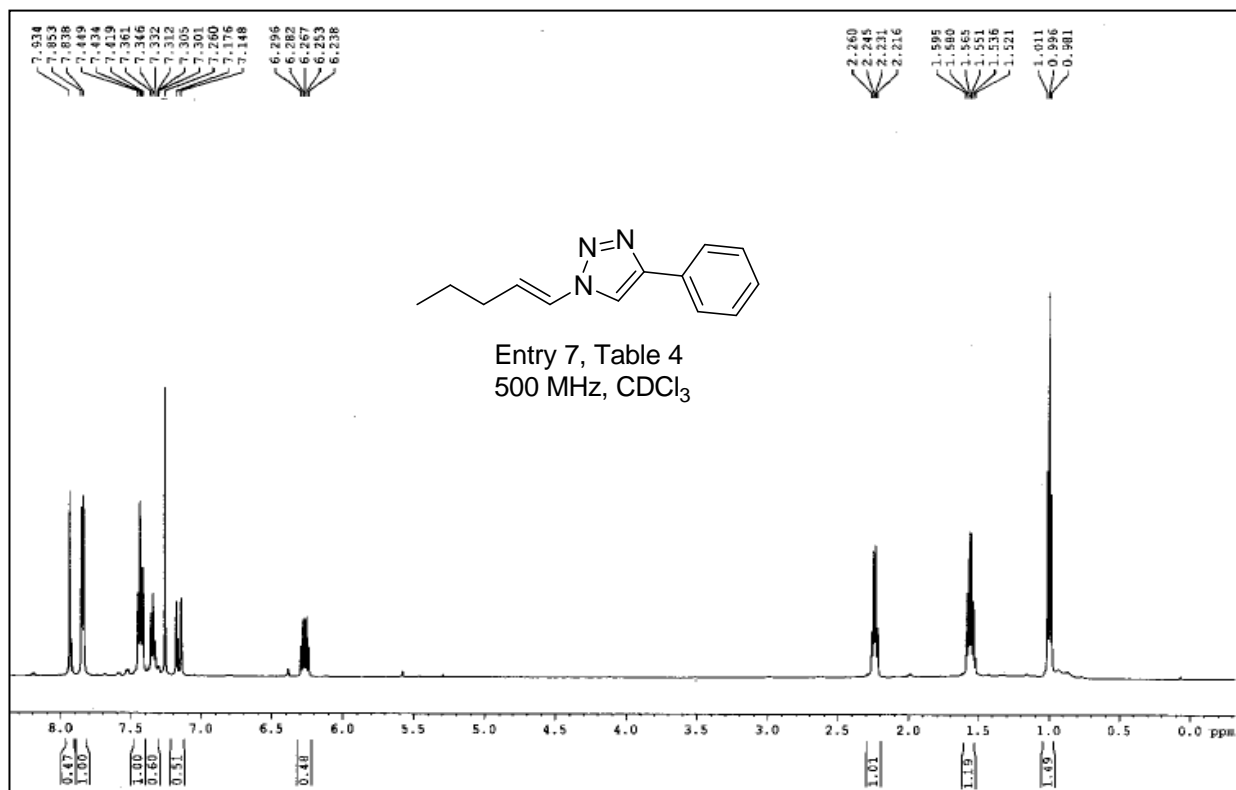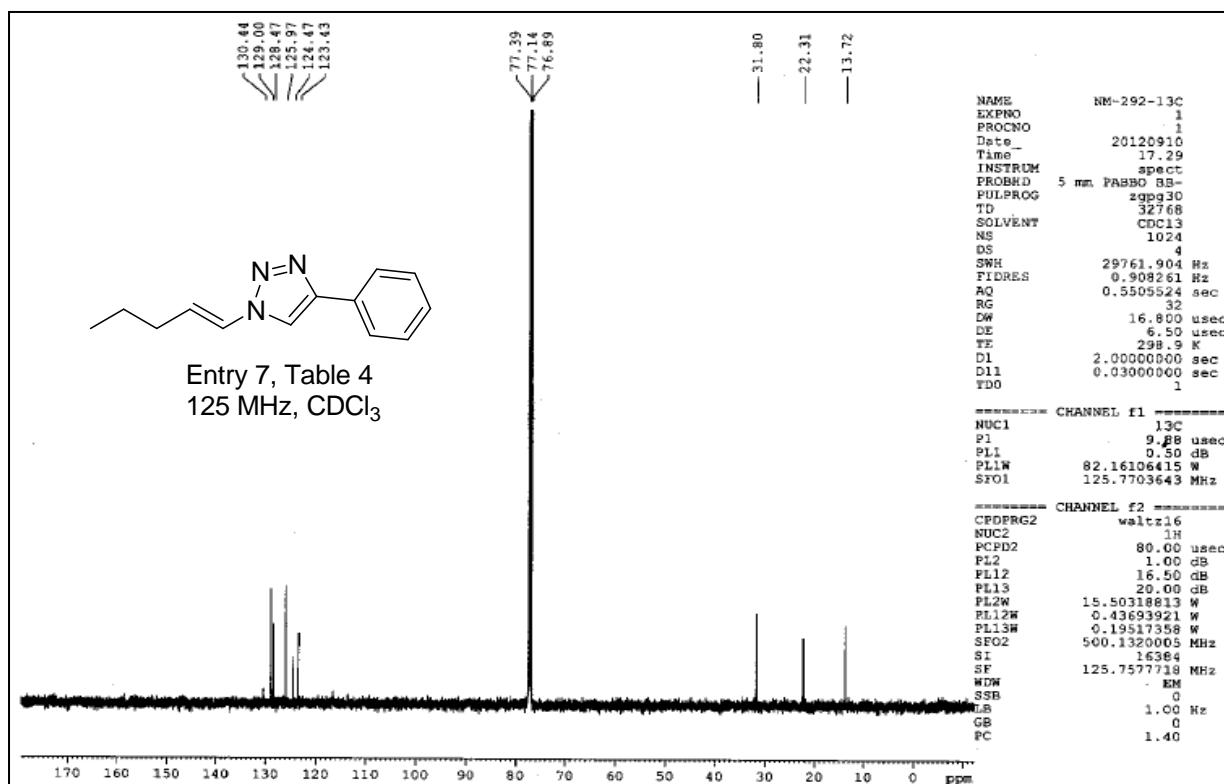

Supplement: c2gc36521a.pdf [file c2gc36521a.pdf]
